# Supplementary material for: Alu and LINE-1 methylation and lung function in the normative ageing study
Source: PubMed Central journal article supplement — BMJ Open. 2012 Oct 17;2(5):e001231. doi: 10.1136/bmjopen-2012-001231 (PMC3488751; doi:10.1136/bmjopen-2012-001231), 2012-10-17
Supplement: bmjopen-2012-001231.draft_revisions.pdf [file bmjopen-2012-001231.draft_revisions.pdf]

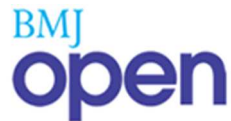

## Alu and LINE-1 Methylation and Lung Function in the Normative Aging Study

|                                 |                                                                                                                                                                                                                                                                                                                                                                                                                                                                                                                                                                                                                                                                                                                                                                                                                                                                                                                                                                                                                                                                                                                                                                                                                                                                                                                                                                                                                                                                                                  |
|---------------------------------|--------------------------------------------------------------------------------------------------------------------------------------------------------------------------------------------------------------------------------------------------------------------------------------------------------------------------------------------------------------------------------------------------------------------------------------------------------------------------------------------------------------------------------------------------------------------------------------------------------------------------------------------------------------------------------------------------------------------------------------------------------------------------------------------------------------------------------------------------------------------------------------------------------------------------------------------------------------------------------------------------------------------------------------------------------------------------------------------------------------------------------------------------------------------------------------------------------------------------------------------------------------------------------------------------------------------------------------------------------------------------------------------------------------------------------------------------------------------------------------------------|
| Journal:                        | <i>BMJ Open</i>                                                                                                                                                                                                                                                                                                                                                                                                                                                                                                                                                                                                                                                                                                                                                                                                                                                                                                                                                                                                                                                                                                                                                                                                                                                                                                                                                                                                                                                                                  |
| Manuscript ID:                  | bmjopen-2012-001231                                                                                                                                                                                                                                                                                                                                                                                                                                                                                                                                                                                                                                                                                                                                                                                                                                                                                                                                                                                                                                                                                                                                                                                                                                                                                                                                                                                                                                                                              |
| Article Type:                   | Research                                                                                                                                                                                                                                                                                                                                                                                                                                                                                                                                                                                                                                                                                                                                                                                                                                                                                                                                                                                                                                                                                                                                                                                                                                                                                                                                                                                                                                                                                         |
| Date Submitted by the Author:   | 26-Apr-2012                                                                                                                                                                                                                                                                                                                                                                                                                                                                                                                                                                                                                                                                                                                                                                                                                                                                                                                                                                                                                                                                                                                                                                                                                                                                                                                                                                                                                                                                                      |
| Complete List of Authors:       | Lange, Nancy; Brigham and Women's Hospital, Channing Laboratory/Division of Pulmonary and Critical Care Medicine<br>Sordillo, Joanne; Channing Laboratory, Brigham and Women's Hospital, Tarantini, Letizia; Universita degli Studi di Milano and IRCCS Maggiore Policlinico Hospital, Center of Molecular and Genetic Epidemiology, Department of Environmental and Occupational Health<br>Bollati, Valentina; Universita degli Studi di Milano and IRCCS Maggiore Policlinico Hospital, Center of Molecular and Genetic Epidemiology, Department of Environmental and Occupational Health<br>Sparrow, David; VA Boston Healthcare System and Boston University School of Medicine, Medicine<br>Vokonas, Pantel; VA Boston Healthcare System and Boston University School of Medicine, Medicine<br>Zanobetti, Antonella; Harvard School of Public Health, Environmental and Occupational Health<br>Schwartz, Joel; Harvard School of Public Health, Environmental Health; Harvard School of Public Health, Environmental and Occupational Health<br>Baccarelli, Andrea; Universita degli Studi di Milano and IRCCS Maggiore Policlinico Hospital, Center of Molecular and Genetic Epidemiology, Department of Environmental and Occupational Health<br>Litonjua, Augusto; Brigham and Women's Hospital, Channing Laboratory/Division of Pulmonary and Critical Care Medicine<br>DeMeo, Dawn; Brigham and Women's Hospital, Channing Laboratory/Division of Pulmonary and Critical Care Medicine |
| <b>Primary Subject Heading</b>: | Respiratory medicine                                                                                                                                                                                                                                                                                                                                                                                                                                                                                                                                                                                                                                                                                                                                                                                                                                                                                                                                                                                                                                                                                                                                                                                                                                                                                                                                                                                                                                                                             |
| Secondary Subject Heading:      | Epidemiology, Genetics and genomics                                                                                                                                                                                                                                                                                                                                                                                                                                                                                                                                                                                                                                                                                                                                                                                                                                                                                                                                                                                                                                                                                                                                                                                                                                                                                                                                                                                                                                                              |
| Keywords:                       | EPIDEMIOLOGY, GENETICS, Thoracic medicine < INTERNAL MEDICINE, Emphysema < THORACIC MEDICINE                                                                                                                                                                                                                                                                                                                                                                                                                                                                                                                                                                                                                                                                                                                                                                                                                                                                                                                                                                                                                                                                                                                                                                                                                                                                                                                                                                                                     |
|                                 |                                                                                                                                                                                                                                                                                                                                                                                                                                                                                                                                                                                                                                                                                                                                                                                                                                                                                                                                                                                                                                                                                                                                                                                                                                                                                                                                                                                                                                                                                                  |

SCHOLARONE™  
Manuscripts

## ***Alu* and LINE-1 Methylation and Lung Function in the Normative Aging Study**

### **Short Title: Global Methylation and Lung Function**

Nancy E. Lange MD MPH,<sup>1-3</sup> Joanne Sordillo ScD<sup>1,3</sup> Letizia Tarantini BS,<sup>4</sup> Valentina Bollati PhD,<sup>4</sup> David Sparrow DSc,<sup>5</sup> Pantel Vokonas MD,<sup>5</sup> Antonella Zanobetti PhD,<sup>6</sup> Joel Schwartz PhD,<sup>6</sup> Andrea Baccarelli MD PhD,<sup>4,6</sup> Augusto A. Litonjua MD MPH<sup>1-3</sup>, Dawn L. DeMeo MD MPH<sup>1-3</sup>

<sup>1</sup>Channing Laboratory, <sup>2</sup>Division of Pulmonary and Critical Care Medicine, Department of Medicine, Brigham and Women's Hospital, Boston, MA, USA; <sup>3</sup>Harvard Medical School, Boston, MA, USA; <sup>4</sup>Center of Molecular and Genetic Epidemiology, Department of Environmental and Occupational Health, Università degli Studi di Milano and IRCCS Maggiore Policlinico Hospital, Mangiagalli and Regina Elena Foundation, Milan, Italy; <sup>5</sup>Veterans Administration Boston Healthcare System and Department of Medicine, Boston University School of Medicine, Boston, MA, USA; <sup>6</sup>Department of Environmental Health, Harvard School of Public Health, Boston, MA, USA.

Corresponding author:

Nancy E. Lange, MD, MPH  
Channing Laboratory  
Brigham and Women's Hospital  
181 Longwood Avenue, room 454  
Boston, MA 02115, USA  
Phone: 617-525-0874  
Fax: 617-525-0958  
Email: [renal@channing.harvard.edu](mailto:renal@channing.harvard.edu)

**Key Words:** epigenetics, global methylation, FEV<sub>1</sub>, FVC, exposure

**Word count:**

Abstract: 217  
Manuscript: 2057

**ABSTRACT**

**Objectives:** To investigate the association between methylation of transposable elements *Alu* and LINE-1 and lung function.

**Design:** Cohort study

**Setting:** Outpatient Veterans Administration facilities in greater Boston, MA, USA.

**Participants:** Subjects from the Veterans Administration Normative Aging Study, a longitudinal study of aging, evaluated between 1999 and 2007.

**Primary and secondary outcome measures:** Primary predictor was methylation, assessed using PCR-pyrosequencing after bisulfite treatment. Primary outcome was lung function as assessed by spirometry, performed according to ATS/ERS guidelines at the same visit as the blood draws.

**Results:** In multivariable models adjusted for age, height, BMI, pack-years of smoking, current smoking and race, *Alu* hypomethylation was associated with lower FEV<sub>1</sub> ( $\beta=28\text{ml}$  per 1% change in *Alu* methylation,  $p=.017$ ), FVC ( $\beta=27\text{ml}$ ,  $p=.06$ ) and lower FEV<sub>1</sub>/FVC ( $\beta=0.3\%$ ,  $p=.058$ ). In multivariable models adjusted for age, height, BMI, pack-years of smoking, current smoking, % lymphocytes, race and baseline lung function, LINE-1 hypomethylation was associated with more rapid decline of FEV<sub>1</sub> ( $\beta=6.9\text{ml/yr}$  per 1% change in LINE-1 methylation,  $p=.005$ ) and of FVC ( $\beta=9.6\text{ml/yr}$ ,  $p=.002$ ).

**Conclusions:** In multiple regression analysis, *Alu* hypomethylation was associated with lower lung function, and LINE-1 hypomethylation was associated with more rapid lung function decline. Future studies should aim to replicate these findings and determine if *Alu* or LINE-1 hypomethylation may be due to specific and modifiable environmental exposures.

1  
2  
3 **Article Summary:**  
4

5 **Article Focus:**  
6

7 Association between methylation, an epigenetic marker, and lung function  
8

9 **Key Message(s):**  
10

11 Hypomethylation of transposable elements is associated with lower lung function and more rapid  
12 lung function decline in a cohort of elderly North American men.  
13

14 **Strengths and Limitations:**  
15

16 First study to evaluate methylation of transposable elements in relation to lung function.  
17

18 Difficult to interpret implications of methylation patterns in transposable elements.  
19  
20  
21  
22  
23  
24  
25  
26  
27  
28  
29  
30  
31  
32  
33  
34  
35  
36  
37  
38  
39  
40  
41  
42  
43  
44  
45  
46  
47  
48  
49  
50  
51  
52  
53  
54  
55  
56  
57  
58  
59  
60

## INTRODUCTION

Lung function has both environmental and genetic determinants.<sup>1-4</sup> Epigenetic changes, which may influence gene expression patterns without changing DNA sequence, may mediate the effects of environmental exposures on disease outcomes. DNA methylation, one type of epigenetic change, is the reversible addition of a methyl group to cytosine nucleotides. Methylation changes may or may not persist over time in the human genome, as epigenetic marks are highly plastic.

A large portion of methylation sites within the genome are found in repeat sequences and transposable elements, such as *Alu* and LINE-1 (long interspersed nuclear element) which are among the most common and best characterized repetitive elements.<sup>5-7</sup> *Alu* is the most abundant of the SINEs (short-interspersed nuclear elements) with over one million copies per genome.<sup>8</sup> *Alu* elements compose approximately 11% of the mass of human genome and contain 30% of its methylation sites.<sup>6,9</sup> LINE-1 elements are present at over half a million copies.<sup>8,10</sup> Methylation of repetitive elements such as *Alu* and LINE-1 has been shown to correlate with total genomic methylation content.<sup>10,11</sup> Hypomethylation in transposable elements is associated with higher genomic instability and alterations or deregulation of gene expression.<sup>12,13</sup>

Prior studies have found associations between methylation of *Alu* or LINE-1 elements and various diseases including multiple cancers,<sup>6</sup> cardiovascular disease<sup>14-16</sup> and neurologic disease<sup>17</sup> as well as with markers of inflammation<sup>18</sup> and the inflammatory response.<sup>19</sup> Studies on gene-specific methylation and non-neoplastic lung disease have found associations between GATA4, CDKN2A (p16) and lung function and an interaction with wood smoke exposure.<sup>20</sup> To our knowledge no prior study has investigated associations between methylation of transposable elements and non-neoplastic lung disease. Moreover, case-control studies such as are common in genomic studies are more problematic for epigenetic marks since sampling cases after disease onset makes it impossible to determine whether epigenetic changes preceded the disease. Hence cohort studies or nested case-control studies within cohorts are particularly valuable. Our aim was to examine whether methylation of the repetitive elements *Alu* and LINE-1 was associated with measures of lung function, COPD status, and longitudinal change in lung function in a

1  
2  
3 cohort of men, the Normative Aging Study. Preliminary results from these analyses were previously  
4 reported in abstract form.<sup>21</sup>  
5  
6  
7  
8  
9

## 10 METHODS

### 11 Population:

12  
13  
14  
15  
16 Study participants were from the Veterans Administration Normative Aging Study, an ongoing  
17 longitudinal study of aging established in 1963.<sup>22</sup> This is a cohort of 2,280 healthy male volunteers from  
18 the greater Boston, MA, area who were 21–80 years of age at entry and who enrolled after an initial  
19 health screening determined that they were free of known chronic medical conditions. Participants were  
20 reevaluated every 3–5 years using detailed on-site physical examinations and questionnaires. The study  
21 was approved by the Institutional Review Boards of all participating institutions. All participants gave  
22 written informed consent.  
23  
24  
25  
26  
27  
28  
29

30 For this study, individuals evaluated at least once between January 1999 and June 2007 with a  
31 blood sample drawn and concomitant spirometry were included. During the study period, this included  
32 663 total subjects, 194 of whom reported for examination two times, for a total of 857 samples collected.  
33  
34  
35  
36  
37

### 38 Measures:

39  
40 Spirometry was performed according to ATS/ERS guidelines.<sup>23</sup> All spirometric values are pre-  
41 bronchodilator. Percent predicted values for FEV<sub>1</sub> and FVC were calculated using equations by Crapo *et*  
42 *al.*<sup>24</sup> COPD was defined as GOLD stage II or higher (FEV<sub>1</sub>/FVC<70% and FEV<sub>1</sub><80% predicted ).<sup>25</sup>  
43  
44 Techniques for assessing DNA methylation were previously described in detail.<sup>26 27</sup> Briefly, we performed  
45 DNA methylation assessment of *Alu* and LINE-1 repetitive elements on bisulfite-treated blood leukocyte  
46 DNA using highly quantitative polymerase chain reaction (PCR)–pyrosequencing technology. The degree  
47 of methylation was expressed as the percentage of methylated cytosines over the sum of methylated and  
48 unmethylated cytosines. Each marker was tested in triplicate, and their average was used in the statistical  
49 analysis.  
50  
51  
52  
53  
54  
55  
56  
57  
58  
59  
60

## Statistical Analysis

Analyses for cross-sectional associations were performed using repeated measures with adjustment for the correlation between measurements in a given individual using mixed effects models (PROC MIXED) for continuous outcomes (FEV<sub>1</sub>, FVC, FEV<sub>1</sub>/FVC) and generalized estimating equations (PROC GENMOD) for binary outcomes (COPD). Covariates in multivariable models were chosen for their clinical relevance and strong bivariate associations ( $p \leq 0.05$ ) with lung function or change in effect estimate criterion of >10% after addition to the model and included age, height, race, pack-years of cigarette smoking, smoking status (dichotomized as current vs. ex and never smokers) and body mass index (BMI). We also considered variables previously associated with methylation of repetitive elements<sup>28</sup> such as folate intake, alcohol intake, total white blood cell count and both percent neutrophils and percent lymphocytes. With the exception of percent lymphocytes, which was included in models with LINE-1 only, these covariates were not included in final models because they were not associated with *Alu* or LINE-1 methylation and did not meet the change in estimate criteria. Because Figure 2 depicts bivariate relationships, percent predicted values were used for both FEV<sub>1</sub> and FVC to show an adjusted value; actual values for FEV<sub>1</sub> and FVC were utilized in multivariable models. To examine associations between methylation of *Alu* and LINE-1 and change in lung function over time, a rate was calculated using the change in lung function between the two time points divided by the amount of time elapsed between the two measurements in years. This value was utilized as an outcome and analyzed using multivariate linear regression models. A total of 301 subjects had a second lung function data point subsequent to the initial methylation value. SAS version 9.1 (SAS Institute, Cary, NC) was used for all analyses.

## RESULTS

Baseline characteristics of the 663 individuals included in this study are shown in **Table 1**. All subjects were male and the majority (640, 97%) of white race. Few subjects were current smokers and 197 (30%) were never smokers. There was wide variation in lung function values. Of the 107 individuals

1  
2  
3 with COPD, 77 (72%) were GOLD stage II, 26 were stage III and 4 were stage IV; overall 20 (20%) of the  
4  
5 individuals with COPD were current smokers.  
6  
7

8 The distribution of percentage methylation of both *Alu* and LINE-1 elements among the  
9  
10 population is shown in **Figure 1**.  
11

12  
13 Bivariate relationships between *Alu* and LINE-1 with outcomes and covariates considered for  
14  
15 inclusion in the multivariable model are shown in **Table 2**. *Alu* methylation was associated or showed a  
16  
17 trend towards association positively with FEV<sub>1</sub>, BMI and FEV<sub>1</sub>/FVC and negatively with age and COPD  
18  
19 status. LINE-1 was positively associated with current smoking and negatively with percent lymphocytes.  
20  
21 Neither *Alu* nor LINE-1 was associated with FVC, pack-years of smoking or ever smoking status. Folate  
22  
23 intake, alcohol intake, total white blood cell count and percent neutrophils were not significantly  
24  
25 associated with *Alu* or LINE-1 in bivariate analyses. There was no significant relationship between  
26  
27 methylation of *Alu* and LINE-1 to each other (p=.23).  
28

29  
30 In multivariate models that included age, height, race, pack-years of smoking, smoking status,  
31  
32 and BMI, *Alu* methylation was positively associated with FEV<sub>1</sub>, FEV<sub>1</sub>/FVC and showed a trend towards  
33  
34 association with FVC. When analyzed excluding current smokers, there was a negative association  
35  
36 between *Alu* and COPD (higher *Alu* with lower odds of COPD) that was statistically significant (OR 0.80  
37  
38 [0.64, 0.99] p=.046). There were no significant associations between LINE-1 and any of the outcomes.  
39  
40 (**Table 3**). **Figure 2** depicts the bivariate associations of *Alu* methylation with FEV<sub>1</sub> % predicted, FVC %  
41  
42 predicted and FEV<sub>1</sub>/FVC.  
43

44  
45 We also analyzed whether methylation of *Alu* and LINE-1 were associated with rate of change in  
46  
47 lung function in a subset of participants who had two consecutive lung function measures (N=301). The  
48  
49 mean number of years elapsed between measurements was 4.03 (SD 1.23). Models were adjusted for  
50  
51 baseline FEV<sub>1</sub>, FVC or FEV<sub>1</sub>/FVC (respectively for the given outcome) as well as age, pack-years of  
52  
53 smoking, BMI, height, race, percent lymphocytes and smoking status. LINE-1 but not *Alu* was associated  
54  
55 negatively with rate of change in FEV<sub>1</sub> and FVC (p<.005). Neither measure was associated with rate of  
56  
57  
58  
59  
60



1  
2  
3 change of FEV<sub>1</sub>/FVC. (Table 4) Including both *Alu* and LINE-1 in the models did not change the results  
4  
5 (data not shown).  
6  
7  
8  
9

## 10 11 DISCUSSION

12  
13 We examined associations between methylation levels of the repetitive elements *Alu* and LINE-1  
14 in a cohort of elderly men in relation to lung function and COPD status. In cross-sectional analyses, we  
15 found that *Alu* hypomethylation was associated with lower FEV<sub>1</sub> with a trend towards association with  
16 lower FVC and FEV<sub>1</sub>/FVC. LINE-1 hypomethylation was associated with more rapid lung function decline  
17 (FEV<sub>1</sub> and FVC).  
18  
19  
20  
21  
22

23  
24 Prior studies have found associations between methylation of repetitive transposable elements  
25 such as *Alu* and LINE-1 and several diseases including multiple cancers,<sup>6</sup> cardiovascular disease<sup>14-16</sup> and  
26 neurologic disease<sup>17</sup> as well as with markers of inflammation.<sup>18</sup> To our knowledge this is the first study to  
27 examine associations between methylation of *Alu* and LINE-1 transposable elements and measures of  
28 lung function.  
29  
30  
31  
32

33  
34 Previous work has shown that in normal subjects, *Alu* hypomethylation is associated with  
35 increased age<sup>7,29</sup>, greater alcohol use and gender (lower in males).<sup>28</sup> In this same cohort (NAS),  
36 hypomethylation has been associated with higher incidence of cancer in general and lung cancer  
37 specifically (LINE-1), as well as higher mortality from cancer (*Alu* and LINE-1).<sup>30</sup> A variety of  
38 environmental exposures such as lead<sup>31</sup> traffic particles<sup>27</sup> organic pollutants,<sup>32</sup> metals, air pollutants and  
39 endocrine disrupting agents<sup>33</sup> may all affect global methylation levels, specifically some that may relate to  
40 lung function such as various air pollutants.  
41  
42  
43  
44  
45  
46

47  
48 Hypomethylation of transposable elements may or may not be causally linked to lower lung  
49 function and faster rates of lung function decline. Lower methylation of *Alu* and LINE-1 may increase their  
50 activity as retrotransposable sequences, leading to greater genomic instability and more mutations.<sup>12</sup>  
51 Furthermore, oxidative damage caused by environmental exposures may cause hypomethylation.<sup>34</sup> This  
52 may lead to alteration of gene expression through a variety of mechanisms including disrupting  
53 transcription factor binding sites or reading frames, altering regulatory sequences, altering methylation  
54  
55  
56  
57  
58  
59  
60

1  
2  
3 patterns of gene promoters, or introducing new transcription factor binding sites.<sup>35-37</sup> *Alu* elements  
4 specifically are preferentially found in gene-rich regions.<sup>38</sup> Black carbon and increased PM<sub>2.5</sub> exposure<sup>27</sup>  
5 as well as PM<sub>10</sub> exposure<sup>33</sup> have been found to be inversely associated with LINE-1 and both *Alu* and  
6 LINE-1 methylation, respectively which may impact lung function or lung function decline.<sup>39</sup> LINE-1  
7 hypomethylation may also increase transcription of genes that have LINE-1 in regulatory regions. It is  
8 possible that other specific environmental or dietary exposures previously not known to be associated  
9 with lung function may be mediated through epigenetic changes such as *Alu* or LINE-1 hypomethylation.  
10 Alternatively, this may be a marker of a specific exposure but not causally linked to lower lung function.  
11 Lastly, because *Alu* methylation decreases with increasing age, as does lung function, our findings may  
12 represent some other measure of 'aging' or exposures resulting in similar processes beyond just  
13 chronological age.<sup>7</sup> As our understanding of epigenetic processes and the exposures that affect these  
14 processes increases, the implications of our findings will become clearer.

15  
16  
17  
18  
19  
20  
21  
22  
23  
24  
25  
26  
27  
28  
29  
30  
31  
32  
33  
34  
35  
36  
37  
38  
39  
40  
41  
42  
43  
44  
45  
46  
47  
48  
49  
50  
51  
52  
53  
54  
55  
56  
57  
58  
59  
60

These data must be interpreted in the context of the study design. Our study was limited to elderly men the majority of whom were white, and our findings may or may not be generalizable to other populations. It is difficult to know how to interpret methylation of retrotransposons, as opposed to gene-specific methylation, in relation to specific outcomes such as lung function and lung function decline. Future studies should include gene-specific methylation analyses to elucidate mechanisms by which methylation changes may relate to these outcomes. We did not control for a variety of environmental exposures that may be associated with both lung function and methylation, however, alteration in methylation patterns may be the pathway through which these changes are mediated and thus including these exposures in multivariate models would be overadjusting. Methylation levels vary in different tissue types and it is possible that assessments of methylation in white blood cells may not reflect alterations seen in lung tissue. However, systemic processes involving white blood cells, such as inflammation, may play a role in the pathophysiology of lung function decline<sup>40</sup> and may nonetheless be markers of specific exposures (such as cigarette smoking) that exert a systemic effect.

In summary, we found that relative hypomethylation of *Alu* was associated with lower lung function measures, and that LINE-1 hypomethylation was associated with more rapid lung function decline. Future studies on both gene-specific methylation as well as exposures related to methylation of

1  
2  
3 retrotransposons will improve our understanding of the relationship between epigenetic changes and lung  
4  
5 function, potentially informing new diagnostic and therapeutic approaches to lung function decline.  
6  
7  
8  
9  
10  
11  
12  
13  
14  
15  
16  
17  
18  
19  
20  
21  
22  
23  
24  
25  
26  
27  
28  
29  
30  
31  
32  
33  
34  
35  
36  
37  
38  
39  
40  
41  
42  
43  
44  
45  
46  
47  
48  
49  
50  
51  
52  
53  
54  
55  
56  
57  
58  
59  
60

For peer review only

**Table 1:** Baseline characteristics of 663 individuals from the Normative Aging Study

|                             | Mean (SD)<br>or N (%) | Range        |
|-----------------------------|-----------------------|--------------|
| <b>Age</b>                  | 72.7 (6.7)            | (55.3-100.9) |
| <b>BMI</b>                  | 28.5 (4.2)            | (19.4-52.3)  |
| <b>Pack-years*</b>          | 30.6 (24.8)           | (0.1-145.5)  |
| <b>Current smokers</b>      | 43 (7%)               |              |
| <b>Ever smokers</b>         | 466 (70%)             |              |
| <b>FEV<sub>1</sub></b>      | 2.70 (.64)            | (.85-4.69)   |
| <b>FEV<sub>1</sub>%pred</b> | 81 (17)               | (28-125)     |
| <b>FVC</b>                  | 3.56 (0.72)           | (1.63-6.32)  |
| <b>FVC%pred</b>             | 82 (14)               | (43-124)     |
| <b>FEV<sub>1</sub>/FVC</b>  | 75 (8)                | (36-94)      |
| <b>COPD</b>                 | 107 (16%)             |              |
| <b>Alu</b>                  | 26.4 (1.1)            | (22.8-32.4)  |
| <b>LINE-1</b>               | 76.8 (1.8)            | (70.1-84.6)  |

\*pack-years in current or ex-smokers only

**Table 2:** Bivariate associations between *Alu*, LINE-1 and other covariates

|                            | <i>Alu</i>         |         | LINE-1           |         |
|----------------------------|--------------------|---------|------------------|---------|
|                            | $\beta$            | p value | $\beta$          | p value |
| <b>Age</b>                 | -0.3               | 0.07    | -0.2             | 0.1     |
| <b>BMI</b>                 | 0.106              | 0.059   | 0.054            | 0.17    |
| <b>Current smoking</b>     | 0.35               | 0.14    | 0.697            | 0.0002  |
| <b>% Lymphocytes</b>       | 0.08               | 0.73    | -0.31            | 0.04    |
| <b>FEV<sub>1</sub></b>     | 0.024              | 0.06    | -0.006           | 0.53    |
| <b>FEV<sub>1</sub>/FVC</b> | 0.31               | 0.046   | -0.05            | 0.67    |
| <b>COPD</b>                | OR .87 [.73, 1.03] | 0.1     | 1.02 [.92, 1.13] | 0.76    |

**Table 3:** Multivariate models for lung function and both *Alu* and LINE-1 methylation\*

|                            | <i>Alu</i>        |         | LINE-1           |         |
|----------------------------|-------------------|---------|------------------|---------|
|                            | $\beta$           | p value | $\beta$          | p value |
| <b>FEV<sub>1</sub></b>     | 0.028             | 0.017   | -0.015           | 0.08    |
| <b>FVC</b>                 | 0.027             | 0.06    | -0.017           | 0.11    |
| <b>FEV<sub>1</sub>/FVC</b> | 0.3               | 0.057   | -0.092           | 0.44    |
| <b>COPD</b>                | 0.85 [0.71, 1.03] | 0.09    | 1.01 [.89, 1.15] | 0.83    |

\*adjusted for age, height, race, BMI, pack-years of smoking, smoking status. Models with LINE-1 also include % lymphocytes.

**Table 4:** Multivariate models for rate of change in lung function (in liters/yr) and both *Alu* and LINE-1 methylation\*

|                   | FEV <sub>1</sub> rate |       | FVC rate |        | ratio rate |       |
|-------------------|-----------------------|-------|----------|--------|------------|-------|
|                   | $\beta$               | p val | $\beta$  | p val  | $\beta$    | p val |
| <b><i>Alu</i></b> | -0.0028               | 0.49  | -0.00098 | 0.84   | -0.00079   | 0.17  |
| <b>LINE-1</b>     | -0.0069               | 0.005 | -0.0096  | 0.0021 | 0.00005    | 0.89  |

\*adjusted for age, height, race, BMI, pack-years of smoking, smoking status, and baseline FEV<sub>1</sub>, FVC or FEV<sub>1</sub>/FVC respectively depending on outcome. Models with LINE-1 also adjusted for % lymphocytes.

For peer review only

1  
2  
3 **Figure Legends**  
4

5 **Figure 1:** Distribution (median, interquartile range) of percentage *Alu* and LINE-1 methylation  
6

7 **Figure 2: *Alu* Methylation and Lung Function**

8 Bivariate associations between *Alu* and FEV<sub>1</sub>%predicted, FVC%predicted and FEV<sub>1</sub>/FVC  
9

10 \* For FEV<sub>1</sub>/FVC y axis is percent, not percent predicted  
11  
12  
13  
14  
15  
16  
17  
18  
19  
20  
21  
22  
23  
24  
25  
26  
27  
28  
29  
30  
31  
32  
33  
34  
35  
36  
37  
38  
39  
40  
41  
42  
43  
44  
45  
46  
47  
48  
49  
50  
51  
52  
53  
54  
55  
56  
57  
58  
59  
60

For peer review only



1  
2  
3 **ACKNOWLEDGMENTS:** We would like to thank all of the participants of the Normative Aging Study.  
4

5 **COMPETING INTERESTS:** None of the authors have any competing interests to report.  
6

7 **FUNDING:** Funded by NIH grants AG027214, ES015172, ES014663, HL007427, HL089438, ES015172-  
8 01 and ES000002, and VA Research and Development Service. Dr. DeMeo is supported by a Doris Duke  
9 Clinical Scientist Development Award. The Cooperative Studies Program/Epidemiology Research and  
10 Information Center of the U.S. Department of Veterans Affairs supported the VA Normative Aging Study,  
11 which is a component of the Massachusetts Veterans Epidemiology Research and Information Center,  
12 Boston, MA.  
13

14 **AUTHOR CONTRIBUTIONS:** N.E.L. designed the study, performed the data analysis, and prepared the  
15 manuscript. J.S. contributed to the data analysis and provided critical revision of the manuscript. L.T.  
16 contributed to data collection and provided critical revision of the manuscript. V.B. contributed to data  
17 collection and provided critical revision of the manuscript. D.S. and P.V. were involved in conception of  
18 the study and critical revision of the manuscript. A.Z. contributed to data collection and provided critical  
19 revision of the manuscript. J.S. contributed to study design and provided critical revision of the  
20 manuscript. A.B. contributed to data collection and provided critical revision of the manuscript. A.A.L.  
21 contributed to study design, assisted with the data analysis, and provided critical revision of the  
22 manuscript. D.L.D. designed the study, assisted with the data analysis, and provided critical revision of  
23 the manuscript.  
24  
25  
26  
27  
28  
29  
30  
31  
32  
33  
34  
35  
36  
37  
38  
39  
40  
41  
42  
43  
44  
45  
46  
47  
48  
49  
50  
51  
52  
53  
54  
55  
56  
57  
58  
59  
60

**References:**

1. Hancock DB, Eijgelsheim M, Wilk JB, Gharib SA, Loehr LR, Marcianti KD, et al. Meta-analyses of genome-wide association studies identify multiple loci associated with pulmonary function. *Nat Genet*;42(1):45-52.
2. Hubert HB, Fabsitz RR, Feinleib M, Gwinn C. Genetic and environmental influences on pulmonary function in adult twins. *Am Rev Respir Dis* 1982;125(4):409-15.
3. McClearn GE, Svartengren M, Pedersen NL, Heller DA, Plomin R. Genetic and environmental influences on pulmonary function in aging Swedish twins. *J Gerontol* 1994;49(6):264-8.
4. Redline S, Tishler PV, Rosner B, Lewitter FI, Vandenburg M, Weiss ST, et al. Genotypic and phenotypic similarities in pulmonary function among family members of adult monozygotic and dizygotic twins. *Am J Epidemiol* 1989;129(4):827-36.
5. Ehrlich M, Gama-Sosa MA, Huang LH, Midgett RM, Kuo KC, McCune RA, et al. Amount and distribution of 5-methylcytosine in human DNA from different types of tissues of cells. *Nucleic Acids Res* 1982;10(8):2709-21.
6. Wilson AS, Power BE, Molloy PL. DNA hypomethylation and human diseases. *Biochim Biophys Acta* 2007;1775(1):138-62.
7. Bollati V, Schwartz J, Wright R, Litonjua A, Tarantini L, Suh H, et al. Decline in genomic DNA methylation through aging in a cohort of elderly subjects. *Mech Ageing Dev* 2009;130(4):234-9.
8. Lander ES, Linton LM, Birren B, Nusbaum C, Zody MC, Baldwin J, et al. Initial sequencing and analysis of the human genome. *Nature* 2001;409(6822):860-921.
9. Deininger PL, Batzer MA. Alu repeats and human disease. *Mol Genet Metab* 1999;67(3):183-93.
10. Yang AS, Estecio MR, Doshi K, Kondo Y, Tajara EH, Issa JP. A simple method for estimating global DNA methylation using bisulfite PCR of repetitive DNA elements. *Nucleic Acids Res* 2004;32(3):e38.
11. Weisenberger DJ, Campan M, Long TI, Kim M, Woods C, Fiala E, et al. Analysis of repetitive element DNA methylation by MethyLight. *Nucleic Acids Res* 2005;33(21):6823-36.
12. Gravina S, Vijg J. Epigenetic factors in aging and longevity. *Pflugers Arch* 2010;459(2):247-58.
13. Dean W, Lucifero D, Santos F. DNA methylation in mammalian development and disease. *Birth Defects Res C Embryo Today* 2005;75(2):98-111.
14. Baccarelli A, Wright R, Bollati V, Litonjua A, Zanobetti A, Tarantini L, et al. Ischemic heart disease and stroke in relation to blood DNA methylation. *Epidemiology* 2010;21(6):819-28.
15. Castro R, Rivera I, Struys EA, Jansen EE, Ravasco P, Camilo ME, et al. Increased homocysteine and S-adenosylhomocysteine concentrations and DNA hypomethylation in vascular disease. *Clin Chem* 2003;49(8):1292-6.
16. Kim M, Long TI, Arakawa K, Wang R, Yu MC, Laird PW. DNA methylation as a biomarker for cardiovascular disease risk. *PLoS One* 2010;5(3):e9692.
17. Bollati V, Galimberti D, Pergoli L, Dalla Valle E, Barretta F, Cortini F, et al. DNA methylation in repetitive elements and Alzheimer disease. *Brain Behav Immun* 2011.
18. Baccarelli A, Tarantini L, Wright RO, Bollati V, Litonjua AA, Zanobetti A, et al. Repetitive element DNA methylation and circulating endothelial and inflammation markers in the VA normative aging study. *Epigenetics* 2010;5(3).
19. Crow MK. Long interspersed nuclear elements (LINE-1): potential triggers of systemic autoimmune disease. *Autoimmunity* 2010;43(1):7-16.
20. Sood A, Petersen H, Blanchette CM, Meek P, Picchi MA, Belinsky SA, et al. Wood smoke exposure and gene promoter methylation are associated with increased risk for COPD in smokers. *Am J Respir Crit Care Med* 2010;182(9):1098-104.

21. Lange NE, Sordillo JE, Tarantini L, Bollati V, Sparrow D, Vokonas P, et al. Global DNA Methylation and Lung Function in the Normative Aging Study [abstract]. *Am J Respir Crit Care Med* 2011;183:A5694.
22. Bell B, Rose C, Damon A. The Normative Aging Study: an interdisciplinary and longitudinal study of health and aging. *Aging and Human Development* 1972;3:5-17.
23. Miller MR, Hankinson J, Brusasco V, Burgos F, Casaburi R, Coates A, et al. Standardisation of spirometry. *Eur Respir J* 2005;26(2):319-38.
24. Crapo RO, Morris AH, Gardner RM. Reference spirometric values using techniques and equipment that meet ATS recommendations. *Am Rev Respir Dis* 1981;123(6):659-64.
25. Harris SS. Vitamin D and African Americans. *J Nutr* 2006;136(4):1126-9.
26. Bollati V, Baccarelli A, Hou L, Bonzini M, Fustinoni S, Cavallo D, et al. Changes in DNA methylation patterns in subjects exposed to low-dose benzene. *Cancer Res* 2007;67(3):876-80.
27. Baccarelli A, Wright RO, Bollati V, Tarantini L, Litonjua AA, Suh HH, et al. Rapid DNA methylation changes after exposure to traffic particles. *Am J Respir Crit Care Med* 2009;179(7):572-8.
28. Zhu ZZ, Hou L, Bollati V, Tarantini L, Marinelli B, Cantone L, et al. Predictors of global methylation levels in blood DNA of healthy subjects: a combined analysis. *Int J Epidemiol* 2010.
29. Jintaridth P, Mutirangura A. Distinctive patterns of age-dependent hypomethylation in interspersed repetitive sequences. *Physiol Genomics* 2010;41:194-200.
30. Zhu ZZ, Sparrow D, Hou L, Tarantini L, Bollati V, Litonjua AA, et al. Repetitive element hypomethylation in blood leukocyte DNA and cancer incidence, prevalence, and mortality in elderly individuals: the Normative Aging Study. *Cancer Causes Control* 2010;22(3):437-47.
31. Pilsner JR, Hu H, Ettinger A, Sanchez BN, Wright RO, Cantonwine D, et al. Influence of prenatal lead exposure on genomic methylation of cord blood DNA. *Environ Health Perspect* 2009;117(9):1466-71.
32. Rusiecki JA, Baccarelli A, Bollati V, Tarantini L, Moore LE, Bonfeld-Jorgensen EC. Global DNA hypomethylation is associated with high serum-persistent organic pollutants in Greenlandic Inuit. *Environ Health Perspect* 2008;116(11):1547-52.
33. Baccarelli A, Bollati V. Epigenetics and environmental chemicals. *Curr Opin Pediatr* 2009;21(2):243-51.
34. Valinluck V, Tsai HH, Rogstad DK, Burdzy A, Bird A, Sowers LC. Oxidative damage to methyl-CpG sequences inhibits the binding of the methyl-CpG binding domain (MBD) of methyl-CpG binding protein 2 (MeCP2). *Nucleic Acids Res* 2004;32(14):4100-8.
35. Norris J, Fan D, Aleman C, Marks JR, Futreal PA, Wiseman RW, et al. Identification of a new subclass of Alu DNA repeats which can function as estrogen receptor-dependent transcriptional enhancers. *J Biol Chem* 1995;270(39):22777-82.
36. Vansant G, Reynolds WF. The consensus sequence of a major Alu subfamily contains a functional retinoic acid response element. *Proc Natl Acad Sci U S A* 1995;92(18):8229-33.
37. Asada K, Kotake Y, Asada R, Saunders D, Broyles RH, Towner RA, et al. LINE-1 hypomethylation in a choline-deficiency-induced liver cancer in rats: dependence on feeding period. *J Biomed Biotechnol* 2006;2006(1):17142.
38. Batzer MA, Deininger PL. Alu repeats and human genomic diversity. *Nat Rev Genet* 2002;3(5):370-9.
39. Andersen ZJ, Hvidberg M, Jensen SS, Kettel M, Loft S, Sorensen M, et al. Chronic obstructive pulmonary disease and long-term exposure to traffic-related air pollution: a cohort study. *Am J Respir Crit Care Med* 2010;183(4):455-61.
40. Nussbaumer-Ochsner Y, Rabe KF. Systemic manifestations of COPD. *Chest* 2011;139(1):165-73.

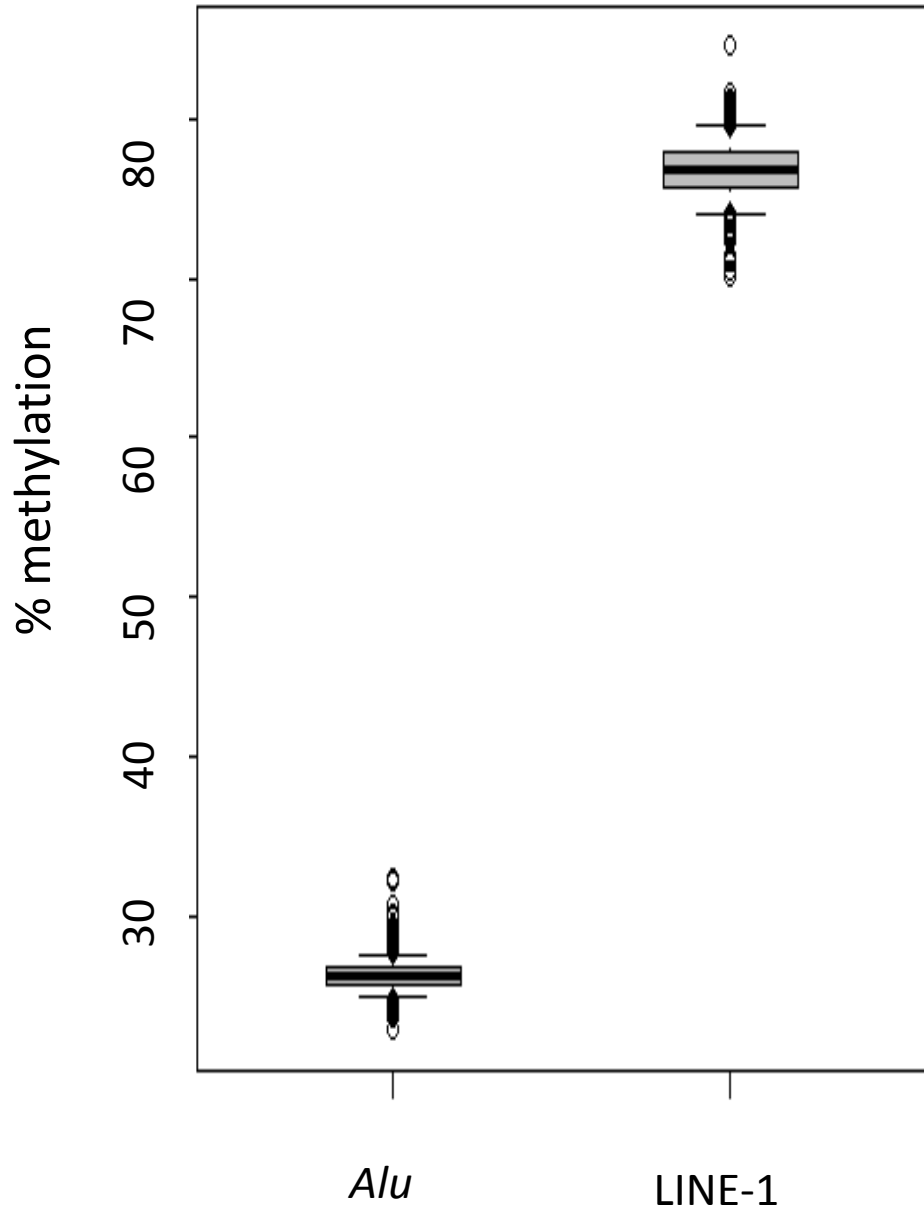

1  
2  
3  
4  
5  
6  
7  
8  
9  
10  
11  
12  
13  
14  
15  
16  
17  
18  
19  
20  
21  
22  
23  
24  
25  
26  
27  
28  
29  
30  
31  
32  
33  
34  
35  
36  
37  
38  
39  
40  
41  
42  
43

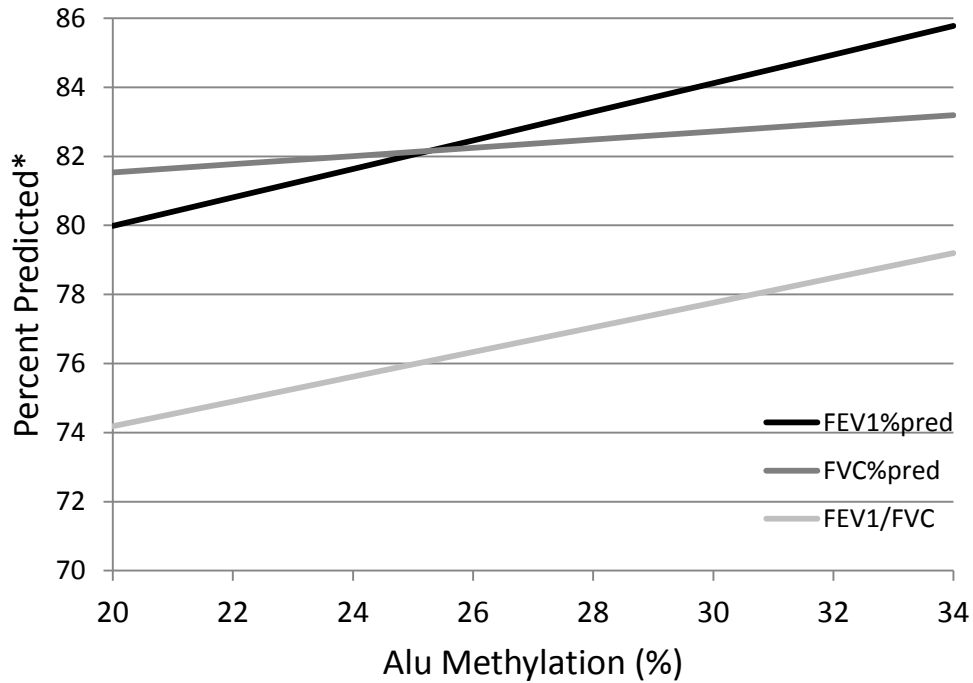

1  
2  
3  
4  
5  
6  
7  
8  
9  
10  
11  
12  
13  
14  
15  
16  
17  
18  
19  
20  
21  
22  
23  
24  
25  
26  
27  
28  
29  
30  
31  
32  
33  
34  
35  
36  
37  
38  
39  
40  
41  
42  
43

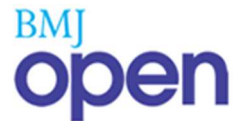

## Alu and LINE-1 Methylation and Lung Function in the Normative Aging Study

|                                 |                                                                                                                                                                                                                                                                                                                                                                                                                                                                                                                                                                                                                                                                                                                                                                                                                                                                                                                                                                                                                                                                                                                                                                                                                                                                                                                                                                                                                                                                                                  |
|---------------------------------|--------------------------------------------------------------------------------------------------------------------------------------------------------------------------------------------------------------------------------------------------------------------------------------------------------------------------------------------------------------------------------------------------------------------------------------------------------------------------------------------------------------------------------------------------------------------------------------------------------------------------------------------------------------------------------------------------------------------------------------------------------------------------------------------------------------------------------------------------------------------------------------------------------------------------------------------------------------------------------------------------------------------------------------------------------------------------------------------------------------------------------------------------------------------------------------------------------------------------------------------------------------------------------------------------------------------------------------------------------------------------------------------------------------------------------------------------------------------------------------------------|
| Journal:                        | <i>BMJ Open</i>                                                                                                                                                                                                                                                                                                                                                                                                                                                                                                                                                                                                                                                                                                                                                                                                                                                                                                                                                                                                                                                                                                                                                                                                                                                                                                                                                                                                                                                                                  |
| Manuscript ID:                  | bmjopen-2012-001231.R1                                                                                                                                                                                                                                                                                                                                                                                                                                                                                                                                                                                                                                                                                                                                                                                                                                                                                                                                                                                                                                                                                                                                                                                                                                                                                                                                                                                                                                                                           |
| Article Type:                   | Research                                                                                                                                                                                                                                                                                                                                                                                                                                                                                                                                                                                                                                                                                                                                                                                                                                                                                                                                                                                                                                                                                                                                                                                                                                                                                                                                                                                                                                                                                         |
| Date Submitted by the Author:   | 01-Aug-2012                                                                                                                                                                                                                                                                                                                                                                                                                                                                                                                                                                                                                                                                                                                                                                                                                                                                                                                                                                                                                                                                                                                                                                                                                                                                                                                                                                                                                                                                                      |
| Complete List of Authors:       | Lange, Nancy; Brigham and Women's Hospital, Channing Laboratory/Division of Pulmonary and Critical Care Medicine<br>Sordillo, Joanne; Channing Laboratory, Brigham and Women's Hospital, Tarantini, Letizia; Universita degli Studi di Milano and IRCCS Maggiore Policlinico Hospital, Center of Molecular and Genetic Epidemiology, Department of Environmental and Occupational Health<br>Bollati, Valentina; Universita degli Studi di Milano and IRCCS Maggiore Policlinico Hospital, Center of Molecular and Genetic Epidemiology, Department of Environmental and Occupational Health<br>Sparrow, David; VA Boston Healthcare System and Boston University School of Medicine, Medicine<br>Vokonas, Pantel; VA Boston Healthcare System and Boston University School of Medicine, Medicine<br>Zanobetti, Antonella; Harvard School of Public Health, Environmental and Occupational Health<br>Schwartz, Joel; Harvard School of Public Health, Environmental Health; Harvard School of Public Health, Environmental and Occupational Health<br>Baccarelli, Andrea; Universita degli Studi di Milano and IRCCS Maggiore Policlinico Hospital, Center of Molecular and Genetic Epidemiology, Department of Environmental and Occupational Health<br>Litonjua, Augusto; Brigham and Women's Hospital, Channing Laboratory/Division of Pulmonary and Critical Care Medicine<br>DeMeo, Dawn; Brigham and Women's Hospital, Channing Laboratory/Division of Pulmonary and Critical Care Medicine |
| <b>Primary Subject Heading</b>: | Respiratory medicine                                                                                                                                                                                                                                                                                                                                                                                                                                                                                                                                                                                                                                                                                                                                                                                                                                                                                                                                                                                                                                                                                                                                                                                                                                                                                                                                                                                                                                                                             |
| Secondary Subject Heading:      | Epidemiology, Genetics and genomics                                                                                                                                                                                                                                                                                                                                                                                                                                                                                                                                                                                                                                                                                                                                                                                                                                                                                                                                                                                                                                                                                                                                                                                                                                                                                                                                                                                                                                                              |
| Keywords:                       | EPIDEMIOLOGY, GENETICS, Thoracic medicine < INTERNAL MEDICINE, Emphysema < THORACIC MEDICINE                                                                                                                                                                                                                                                                                                                                                                                                                                                                                                                                                                                                                                                                                                                                                                                                                                                                                                                                                                                                                                                                                                                                                                                                                                                                                                                                                                                                     |
|                                 |                                                                                                                                                                                                                                                                                                                                                                                                                                                                                                                                                                                                                                                                                                                                                                                                                                                                                                                                                                                                                                                                                                                                                                                                                                                                                                                                                                                                                                                                                                  |

SCHOLARONE™  
Manuscripts

## ***Alu* and LINE-1 Methylation and Lung Function in the Normative Aging Study**

### **Short Title: Global Methylation and Lung Function**

Nancy E. Lange MD MPH,<sup>1-3</sup> Joanne Sordillo ScD<sup>1,3</sup> Letizia Tarantini BS,<sup>4</sup> Valentina Bollati PhD,<sup>4</sup> David Sparrow DSc,<sup>5</sup> Pantel Vokonas MD,<sup>5</sup> Antonella Zanobetti PhD,<sup>6</sup> Joel Schwartz PhD,<sup>6</sup> Andrea Baccarelli MD PhD,<sup>4,6</sup> Augusto A. Litonjua MD MPH<sup>1-3</sup>, Dawn L. DeMeo MD MPH<sup>1-3</sup>

<sup>1</sup>Channing Division of Network Medicine, <sup>2</sup>Division of Pulmonary and Critical Care Medicine, Department of Medicine, Brigham and Women's Hospital, Boston, MA, USA; <sup>3</sup>Harvard Medical School, Boston, MA, USA; <sup>4</sup>Center of Molecular and Genetic Epidemiology, Department of Environmental and Occupational Health, Università degli Studi di Milano and IRCCS Maggiore Policlinico Hospital, Mangiagalli and Regina Elena Foundation, Milan, Italy; <sup>5</sup>Veterans Administration Boston Healthcare System and Department of Medicine, Boston University School of Medicine, Boston, MA, USA; <sup>6</sup>Department of Environmental Health, Harvard School of Public Health, Boston, MA, USA.

Corresponding author:

Nancy E. Lange, MD, MPH  
Channing Laboratory  
Brigham and Women's Hospital  
181 Longwood Avenue, room 454  
Boston, MA 02115, USA  
Phone: 617-525-0874  
Fax: 617-525-0958  
Email: [renal@channing.harvard.edu](mailto:renal@channing.harvard.edu)

**Key Words:** epigenetics, global methylation, FEV<sub>1</sub>, FVC, exposure

**Word count:**

Abstract: 247  
Manuscript: 2390

**ABSTRACT**

**Objectives:** To investigate the association between methylation of transposable elements *Alu* and LINE-1 and lung function.

**Design:** Cohort study

**Setting:** Outpatient Veterans Administration facilities in greater Boston, MA, USA.

**Participants:** Subjects from the Veterans Administration Normative Aging Study, a longitudinal study of aging in men, evaluated between 1999 and 2007. The majority (97%) of subjects were white.

**Primary and secondary outcome measures:** Primary predictor was methylation, assessed using PCR-pyrosequencing after bisulfite treatment. Primary outcome was lung function as assessed by spirometry, performed according to ATS/ERS guidelines at the same visit as the blood draws.

**Results:** In multivariable models adjusted for age, height, BMI, pack-years of smoking, current smoking and race, *Alu* hypomethylation was associated with lower FEV<sub>1</sub> ( $\beta=28\text{ml}$  per 1% change in *Alu* methylation,  $p=.017$ ) and showed a trend towards association with a lower FVC ( $\beta=27\text{ml}$ ,  $p=.06$ ) and lower FEV<sub>1</sub>/FVC ( $\beta=0.3\%$ ,  $p=.058$ ). In multivariable models adjusted for age, height, BMI, pack-years of smoking, current smoking, % lymphocytes, race and baseline lung function, LINE-1 hypomethylation was associated with more rapid decline of FEV<sub>1</sub> ( $\beta=6.9\text{ml/yr}$  per 1% change in LINE-1 methylation,  $p=.005$ ) and of FVC ( $\beta=9.6\text{ml/yr}$ ,  $p=.002$ ).

**Conclusions:** In multiple regression analysis, *Alu* hypomethylation was associated with lower lung function, and LINE-1 hypomethylation was associated with more rapid lung function decline in a cohort of older and primarily white men from North America. Future studies should aim to replicate these findings



1  
2  
3 and determine if *Alu* or LINE-1 hypomethylation may be due to specific and modifiable environmental  
4 exposures.  
5  
6  
7

8  
9 **Article Summary:**

10  
11 **Article Focus:**

12 Association between methylation, an epigenetic marker, and lung function  
13

14  
15 **Key Message(s):**

16  
17 Relative hypomethylation of transposable elements is associated with lower lung function and  
18 more rapid lung function decline in a cohort of older North American primarily white men.  
19

20  
21 **Strengths and Limitations:**

22 First study to evaluate methylation of transposable elements in relation to lung function.  
23

24 Difficult to interpret implications of methylation patterns in transposable elements.  
25  
26  
27  
28  
29  
30  
31  
32  
33  
34  
35  
36  
37  
38  
39  
40  
41  
42  
43  
44  
45  
46  
47  
48  
49  
50  
51  
52  
53  
54  
55  
56  
57  
58  
59  
60

## INTRODUCTION

Lung function has both environmental and genetic determinants.<sup>1-5</sup> Epigenetic variation, which may influence gene expression patterns without changing DNA sequence, may mediate the effects of environmental exposures on disease outcomes. DNA methylation, one type of epigenetic change, is the reversible addition of a methyl group to cytosine nucleotides. Methylation changes may or may not persist over time in the human genome, as epigenetic marks are highly plastic.

A large portion of methylation sites within the genome are found in repeat sequences and transposable elements, such as *Alu* and LINE-1 (long interspersed nuclear element) which are among the most common and best characterized repetitive elements.<sup>6-8</sup> *Alu* is the most abundant of the SINEs (short-interspersed nuclear elements) with over one million copies per genome.<sup>9</sup> *Alu* elements compose approximately 11% of the mass of human genome and contain 30% of its methylation sites.<sup>7 10</sup> LINE-1 elements are present at over half a million copies.<sup>9 11</sup> Methylation of repetitive elements such as *Alu* and LINE-1 has been shown to correlate with total genomic methylation content.<sup>11 12</sup> Hypomethylation in transposable elements is associated with higher genomic instability and alterations or deregulation of gene expression.<sup>13 14</sup>

Prior studies have found associations between methylation of *Alu* or LINE-1 elements and various diseases including multiple cancers,<sup>7</sup> cardiovascular disease<sup>15-17</sup> and neurologic disease<sup>18</sup> as well as with markers of inflammation<sup>19</sup> and the inflammatory response.<sup>20</sup> Studies on gene-specific methylation and non-neoplastic lung disease have found associations between GATA4, CDKN2A (p16) and lung function and an interaction with wood smoke exposure,<sup>21</sup> as well as multiple genes in association with COPD presence and severity.<sup>22</sup> To our knowledge no prior study has investigated associations between methylation of transposable elements and non-neoplastic lung disease. Moreover, case-control studies which are common in genomic studies are more problematic for epigenetic marks since sampling cases after disease onset makes it impossible to determine whether epigenetic changes preceded or resulted from the disease. Hence cohort studies or nested case-control studies within cohorts are particularly valuable. Our aim was to examine whether methylation of the repetitive elements *Alu* and LINE-1 was associated with measures of lung function, COPD status, and longitudinal change in lung function in a

1  
2  
3 cohort of men, the Normative Aging Study. Preliminary results from these analyses were previously  
4 reported in abstract form.<sup>23</sup>  
5  
6  
7  
8  
9

## 10 **METHODS**

### 11 **Population:**

12  
13  
14  
15  
16 Study participants were from the Veterans Administration Normative Aging Study, an ongoing  
17 longitudinal study of aging established in 1963.<sup>24</sup> This is a cohort of 2,280 healthy male volunteers from  
18 the greater Boston, MA, area who were 21–80 years of age at entry and who enrolled after an initial  
19 health screening determined that they were free of known chronic medical conditions. Participants were  
20 reevaluated every 3–5 years using detailed on-site physical examinations and questionnaires. The study  
21 was approved by the Institutional Review Boards of all participating institutions. All participants gave  
22 written informed consent.  
23  
24  
25  
26  
27  
28  
29

30  
31 Prior to 1999, 706 subjects had died and others were either lost to follow-up, being followed by  
32 questionnaire only, or had no blood samples left for analyses (n=792). Seven hundred and eighty two  
33 subjects had blood samples that were available for methylation analysis resulting in 704 subjects with  
34 unique IDs and methylation data as previously described.<sup>25 26</sup> For this study, individuals evaluated at least  
35 once between March 1999 and June 2007 with methylation data and concomitant spirometry were  
36 included. During the study period, this included 663 total subjects, 194 of whom reported for blood draw  
37 two times, for a total of 857 samples collected. For the analysis of lung function decline, a second  
38 spirometric measurement was available on 301 subjects who had had an initial blood draw for  
39 methylation measurement.  
40  
41  
42  
43  
44  
45  
46  
47  
48  
49

### 50 **Measures:**

51  
52 Spirometry was performed as previously described<sup>27</sup> and was repeated up to a maximum of 8  
53 spirograms, so that at least 3 acceptable spirograms were obtained, at least 2 of which were reproducible  
54 with FEV<sub>1</sub> and FVC measurements within 5% of each spirogram; the best of these 2 values was selected  
55  
56  
57  
58  
59  
60

1  
2  
3 from a given encounter. Acceptability of spirograms was judged according to ATS standards.<sup>28 29</sup> All  
4 spirometric values are pre-bronchodilator. Percent predicted values for FEV<sub>1</sub> and FVC were calculated  
5 using equations by Crapo *et al.*<sup>30</sup> COPD was defined as GOLD stage II or higher (FEV<sub>1</sub>/FVC<70% and  
6 FEV<sub>1</sub><80% predicted ).<sup>31</sup> Techniques for assessing DNA methylation were previously described in  
7 detail.<sup>32 33</sup> Briefly, we performed DNA methylation assessment of *Alu* and LINE-1 repetitive elements on  
8 bisulfite-treated blood leukocyte DNA using highly quantitative polymerase chain reaction (PCR)–  
9 pyrosequencing technology. The degree of methylation was expressed as the percentage of methylated  
10 cytosines over the sum of methylated and unmethylated cytosines. Each marker was tested in triplicate,  
11 and their average was used in the statistical analysis.  
12  
13  
14  
15  
16  
17  
18  
19  
20  
21  
22

### 23 **Statistical Analysis**

24  
25  
26 Analyses for cross-sectional associations were performed using repeated measures with  
27 adjustment for the correlation between measurements in a given individual using mixed effects models  
28 (PROC MIXED) for continuous outcomes (FEV<sub>1</sub>, FVC, FEV<sub>1</sub>/FVC) and generalized estimating equations  
29 (PROC GENMOD) for binary outcomes (COPD). Covariates in multivariable models were chosen for their  
30 clinical relevance and strong bivariate associations ( $p \leq .05$ ) with lung function or change in effect estimate  
31 criterion of >10% after addition to the model and included age, height, race, pack-years of cigarette  
32 smoking, smoking status (dichotomized as current vs. ex and never smokers) and body mass index  
33 (BMI). We also considered variables previously associated with methylation of repetitive elements<sup>34</sup> such  
34 as folate intake, alcohol intake, total white blood cell count and both percent neutrophils and percent  
35 lymphocytes. With the exception of percent lymphocytes, which was included in models with LINE-1 only,  
36 these covariates were not included in final models because they were not associated with *Alu* or LINE-1  
37 methylation and did not meet the change in estimate criteria. Because Figure 2 depicts bivariate  
38 relationships, percent predicted values were used for both FEV<sub>1</sub> and FVC to show an adjusted value;  
39 actual values for FEV<sub>1</sub> and FVC were utilized in multivariable models. To examine associations between  
40 methylation of *Alu* and LINE-1 and change in lung function over time, a rate was calculated using the  
41 change in lung function between the two time points divided by the amount of time elapsed between the  
42 two measurements in years. This value was utilized as an outcome and analyzed using multivariate linear  
43  
44  
45  
46  
47  
48  
49  
50  
51  
52  
53  
54  
55  
56  
57  
58  
59  
60

1  
2  
3 regression models. A total of 301 subjects had a second lung function data point subsequent to the initial  
4 methylation value. SAS version 9.1 (SAS Institute, Cary, NC) was used for all analyses.  
5  
6  
7  
8  
9

## 10 RESULTS

11  
12  
13  
14 Baseline characteristics of the 663 individuals included in this study as well as of the subset of  
15 301 individuals with two lung function measures are shown in **Table 1**. All subjects were male and the  
16 majority (640, 97%) of white race. Forty-three subjects (7%) were current smokers and 197 (30%) were  
17 never smokers. There was wide variation in lung function values. Of the 107 individuals with COPD, 77  
18 (72%) were GOLD stage II, 26 were stage III and 4 were stage IV; overall 20 (20%) of the individuals with  
19 COPD were current smokers.  
20  
21  
22  
23  
24

25  
26 The distribution of percentage methylation of both *Alu* and LINE-1 elements among the  
27 population and stratified by smoking status is shown in **Figure 1**.  
28  
29  
30

31 Bivariate relationships between *Alu* and LINE-1 methylation with outcomes and covariates  
32 considered for inclusion in the multivariable model are shown in **Table 2**. *Alu* methylation was associated  
33 or showed a trend towards association positively with FEV<sub>1</sub>, BMI and FEV<sub>1</sub>/FVC and negatively with age  
34 and COPD status. LINE-1 methylation was positively associated with current smoking and negatively with  
35 percent lymphocytes. Neither *Alu* nor LINE-1 methylation was associated with FVC, pack-years of  
36 smoking or ever smoking status. Folate intake, alcohol intake, total white blood cell count and percent  
37 neutrophils were not significantly associated with *Alu* or LINE-1 methylation in bivariate analyses. There  
38 was no significant relationship between methylation of *Alu* and LINE-1 to each other (p=.23).  
39  
40  
41  
42  
43  
44  
45  
46  
47

48 In multivariate models that included age, height, race, pack-years of smoking, smoking status,  
49 and BMI, *Alu* methylation was positively associated with FEV<sub>1</sub>, and showed a trend towards association  
50 with FVC and FEV<sub>1</sub>/FVC. Because of recent data suggesting that current smoking status may have  
51 differential effects on methylation<sup>35 36</sup> and because this may relate to disease outcome or risk, we  
52 investigated whether our results would change if current smokers were excluded from the analyses.  
53  
54  
55  
56  
57 Higher *Alu* methylation was still associated with lower odds of COPD (OR 0.80 [0.64, 0.99] p=.046). In  
58  
59  
60

1  
2  
3 analyses of lung function measures, results were in the same direction but were no longer significant  
4  
5 except for FEV<sub>1</sub>/FVC (FEV<sub>1</sub> p=0.17, FVC p=0.7, FEV<sub>1</sub>/FVC p=.029). There were no significant  
6  
7 associations between LINE-1 methylation and any of the cross-sectional outcomes (**Table 3**). **Figure 2**  
8  
9 depicts the bivariate associations of *Alu* methylation with FEV<sub>1</sub> % predicted, FVC % predicted and  
10  
11 FEV<sub>1</sub>/FVC.

12  
13 We also analyzed whether methylation of *Alu* and LINE-1 were associated with rate of change in  
14  
15 lung function in a subset of participants who had two consecutive lung function measures (N=301). The  
16  
17 mean number of years elapsed between measurements was 4.03 (SD 1.23). Models were adjusted for  
18  
19 baseline FEV<sub>1</sub>, FVC or FEV<sub>1</sub>/FVC (respectively for the given outcome) as well as age, pack-years of  
20  
21 smoking, BMI, height, race, percent lymphocytes and smoking status. Relative hypomethylation in LINE-1  
22  
23 but not *Alu* was associated with faster rate of decline in FEV<sub>1</sub> and FVC (p<.005). Neither measure was  
24  
25 associated with rate of change of FEV<sub>1</sub>/FVC. (**Table 4**) Including both *Alu* and LINE-1 methylation in the  
26  
27 models did not change the results (data not shown). Because of prior associations between methylation  
28  
29 of repetitive elements and cardiovascular disease<sup>15-17</sup>, we repeated both cross-sectional and longitudinal  
30  
31 analyses including variables for cardiovascular disease (myocardial infarction, stroke, angina,  
32  
33 hypertension, ischemic heart disease) and diabetes and found no difference in the results (data not  
34  
35 shown). Analyses were also repeated in whites only to determine whether results might be due to  
36  
37 population stratification and results did not change (data not shown). Analyses excluding current smokers  
38  
39 remained significant (data not shown).

## 40 41 42 43 **DISCUSSION**

44  
45  
46 We examined associations between methylation levels of the repetitive elements *Alu* and LINE-1  
47  
48 in a cohort of older men in relation to lung function and COPD status. In cross-sectional analyses, we  
49  
50 found that *Alu* hypomethylation was associated with lower FEV<sub>1</sub> with a trend towards association with  
51  
52 lower FVC and FEV<sub>1</sub>/FVC. LINE-1 hypomethylation was associated with more rapid lung function decline  
53  
54 (FEV<sub>1</sub> and FVC).

1  
2  
3 Prior studies have found associations between methylation of repetitive transposable elements  
4 such as *Alu* and LINE-1 and several diseases including multiple cancers,<sup>7</sup> cardiovascular disease<sup>15-17</sup> and  
5 neurologic disease<sup>18</sup> as well as with markers of inflammation.<sup>19</sup> To our knowledge this is the first study to  
6 examine associations between methylation of *Alu* and LINE-1 transposable elements and measures of  
7 lung function.  
8  
9

10  
11  
12 Previous work has shown that in normal subjects, *Alu* hypomethylation is associated with  
13 increased age<sup>8,37</sup>, greater alcohol use and gender (lower in males).<sup>34</sup> In this same cohort (NAS),  
14 hypomethylation has been associated with higher incidence of cancer in general and lung cancer  
15 specifically (LINE-1 methylation), as well as higher mortality from cancer (*Alu* and LINE-1 methylation).<sup>38</sup>  
16 A variety of environmental exposures such as lead<sup>39</sup> traffic particles<sup>33</sup> organic pollutants,<sup>40</sup> metals, air  
17 pollutants and endocrine disrupting agents<sup>41</sup> may all affect global methylation levels, specifically some  
18 that may relate to lung function such as various air pollutants.  
19  
20  
21

22  
23 Hypomethylation of transposable elements may or may not be causally linked to lower lung  
24 function and faster rates of lung function decline. Lower methylation of *Alu* and LINE-1 may increase their  
25 activity as retrotransposable sequences, leading to greater genomic instability and more mutations.<sup>13</sup>  
26 Furthermore, oxidative damage caused by environmental exposures may cause hypomethylation.<sup>42</sup> This  
27 may lead to alteration of gene expression through a variety of mechanisms including disrupting  
28 transcription factor binding sites or reading frames, altering regulatory sequences, altering methylation  
29 patterns of gene promoters, or introducing new transcription factor binding sites.<sup>43-45</sup> *Alu* elements  
30 specifically are preferentially found in gene-rich regions.<sup>46</sup> Black carbon and increased PM<sub>2.5</sub> exposure<sup>33</sup>  
31 as well as PM<sub>10</sub> exposure<sup>41</sup> have been found to be inversely associated with LINE-1 methylation and both  
32 *Alu* and LINE-1 methylation, respectively which may impact lung function or lung function decline.<sup>47</sup> LINE-  
33 1 hypomethylation may also increase transcription of genes that have LINE-1 in regulatory regions. It is  
34 possible that other specific environmental or dietary exposures previously not known to be associated  
35 with lung function may be mediated through epigenetic changes such as *Alu* or LINE-1 hypomethylation.  
36 Alternatively, this may be a marker of a specific exposure but not causally linked to lower lung function.  
37 Lastly, because *Alu* methylation decreases with increasing age, as does lung function, our findings may  
38 represent some other measure of 'aging' or exposures resulting in similar processes beyond just  
39  
40  
41  
42  
43  
44  
45  
46  
47  
48  
49  
50  
51  
52  
53  
54  
55  
56  
57  
58  
59  
60

1  
2  
3 chronological age.<sup>8</sup> As our understanding of epigenetic processes and the exposures that affect these  
4  
5 processes increases, the implications of our findings will become clearer.  
6

7  
8 These data must be interpreted in the context of the study design. Our study was limited to older  
9  
10 men the majority of whom were white, and our findings may or may not be generalizable to other  
11  
12 populations. It is difficult to know how to interpret methylation of retrotransposons, as opposed to gene-  
13  
14 specific methylation, in relation to specific outcomes such as lung function and lung function decline.  
15  
16 Future studies in this and other cohorts should include gene-specific methylation analyses similar to Qiu  
17  
18 *et al*<sup>22</sup> to elucidate mechanisms by which methylation changes may relate to these outcomes. We did not  
19  
20 control for a variety of environmental exposures that may be associated with both lung function and  
21  
22 methylation. However, alteration in methylation patterns may be the pathway through which these  
23  
24 changes are mediated and thus including these exposures in multivariate models would be overadjusting.  
25  
26 Methylation levels vary in different tissue types and it is possible that assessments of methylation in  
27  
28 white blood cells may not reflect alterations seen in lung tissue. However, systemic processes involving  
29  
30 white blood cells, such as inflammation, may play a role in the pathophysiology of lung function decline<sup>48</sup>  
31  
32 and may nonetheless be markers of specific exposures (such as cigarette smoking) that exert a systemic  
33  
34 effect.

35  
36 In summary, we found that relative hypomethylation of *Alu* was associated with lower lung  
37  
38 function measures, and that LINE-1 hypomethylation was associated with more rapid lung function  
39  
40 decline. Future studies on both gene-specific methylation as well as exposures related to methylation of  
41  
42 retrotransposons will improve our understanding of the relationship between epigenetic changes and lung  
43  
44 function, potentially informing new diagnostic and therapeutic approaches to lung function decline and  
45  
46 diseases such as COPD.  
47  
48  
49  
50  
51  
52  
53  
54  
55  
56  
57  
58  
59  
60



**Table 1:** Baseline characteristics of 663 individuals from the Normative Aging Study and subset of 301 individuals who had more than one lung function measurement for analysis of lung function decline

|                                          | Full data set      |                | 301 subset         |                |
|------------------------------------------|--------------------|----------------|--------------------|----------------|
|                                          | Mean (SD) or N (%) | Range          | Mean (SD) or N (%) | Range          |
| Age                                      | 72.7 (6.7)         | (55.3-100.9)   | 71.5 (6.4)         | (55.3-91.0)    |
| BMI                                      | 28.5 (4.2)         | (19.4-52.3)    | 28.7 (4.1)         | (20.3-52.3)    |
| Pack-years*                              | 30.6 (24.8)        | (0.1-145.5)    | 28.6 (23.1)        | (0.10-120.8)   |
| Current smokers                          | 43 (7%)            |                | 23 (8%)            |                |
| Ever smokers                             | 466 (70%)          |                | 216 (70%)          |                |
| Folate intake <sup>†</sup> (mcg/day)     | 570 (333)          | (0.23-2235.17) | 617 (383)          | (0.23-2001.75) |
| Alcohol intake (gm/day)                  | 12.0 (17.8)        | (0-217.8)      | 10.7 (13.8)        | (0-73.5)       |
| WBC (x10 <sup>3</sup> /mm <sup>3</sup> ) | 6.7 (1.8)          | (2.7-23.8)     | 6.6 (2.3)          | (3.2-36.6)     |
| % lymphocytes                            | 25.6 (8.0)         | (5-88)         | 25.0 (8.3)         | (7-85)         |
| % neutrophils                            | 62.1 (8.7)         | (5-85)         | 62.8 (8.8)         | (5-83)         |
| Cardiovascular Disease <sup>‡</sup>      | 115 (17%)          |                | 49 (16%)           |                |
| Hypertension                             | 280 (42%)          |                | 143 (47%)          |                |
| Diabetes                                 | 75 (11%)           |                | 33 (11%)           |                |
| FEV <sub>1</sub>                         | 2.70 (.64)         | (.85-4.69)     | 2.76 (0.62)        | (1.29-4.69)    |
| FEV <sub>1</sub> %pred                   | 81 (17)            | (28-125)       | 81.8 (15.5)        | (39.7-122.6)   |
| FVC                                      | 3.56 (0.72)        | (1.63-6.32)    | 3.64 (0.71)        | (1.63-6.32)    |
| FVC%pred                                 | 82 (14)            | (43-124)       | 82.6 (13.1)        | (43.8-123.8)   |
| FEV <sub>1</sub> /FVC                    | 75 (8)             | (36-94)        | 75.6 (7.0)         | (51.6-94.4)    |
| COPD                                     | 107 (16%)          |                | 45 (15%)           |                |
| Alu                                      | 26.4 (1.1)         | (22.8-32.4)    | 26.4 (1.10)        | (22.8-32.3)    |
| LINE-1                                   | 76.8 (1.8)         | (70.1-84.6)    | 77.0 (1.8)         | (70.1-81.6)    |

\*pack-years in current or ex-smokers only

<sup>†</sup>calculated based on supplement intake and fortified foods from food frequency questionnaire

<sup>‡</sup> angina, stroke, myocardial infarction, ischemic heart disease

**Table 2:** Bivariate associations between *Alu*, LINE-1 methylation and other covariates

|                       | <i>Alu</i>         |         | LINE-1           |         |
|-----------------------|--------------------|---------|------------------|---------|
|                       | $\beta$            | p value | $\beta$          | p value |
| Age                   | -0.3               | 0.07    | -0.2             | 0.1     |
| BMI                   | 0.106              | 0.059   | 0.054            | 0.17    |
| Current smoking       | 0.35               | 0.14    | 0.697            | 0.0002  |
| % Lymphocytes         | 0.08               | 0.73    | -0.31            | 0.04    |
| FEV <sub>1</sub>      | 0.024              | 0.06    | -0.006           | 0.53    |
| FVC                   | 0.023              | 0.22    | -0.004           | 0.73    |
| FEV <sub>1</sub> /FVC | 0.31               | 0.046   | -0.05            | 0.67    |
| COPD                  | OR .87 [.73, 1.03] | 0.1     | 1.02 [.92, 1.13] | 0.76    |

**Table 3:** Multivariate models for lung function and both *Alu* and LINE-1 methylation\*

|                            | <i>Alu</i>        |         | LINE-1           |         |
|----------------------------|-------------------|---------|------------------|---------|
|                            | $\beta$           | p value | $\beta$          | p value |
| <b>FEV<sub>1</sub></b>     | 0.028             | 0.017   | -0.015           | 0.08    |
| <b>FVC</b>                 | 0.027             | 0.06    | -0.017           | 0.11    |
| <b>FEV<sub>1</sub>/FVC</b> | 0.3               | 0.057   | -0.092           | 0.44    |
| <b>COPD</b>                | 0.85 [0.71, 1.03] | 0.09    | 1.01 [.89, 1.15] | 0.83    |

\*adjusted for age, height, race, BMI, pack-years of smoking, smoking status. Models with LINE-1 also include % lymphocytes.

**Table 4:** Multivariate models for rate of change in lung function (in liters/yr) and both *Alu* and LINE-1 methylation\*

|                             | <i>Alu</i> |       | LINE-1  |        |
|-----------------------------|------------|-------|---------|--------|
|                             | $\beta$    | p val | $\beta$ | p val  |
| <b>FEV<sub>1</sub> rate</b> | -0.0028    | 0.49  | -0.0069 | 0.005  |
| <b>FVC rate</b>             | -0.00098   | 0.84  | -0.0096 | 0.0021 |
| <b>ratio rate</b>           | -0.00079   | 0.17  | 0.00005 | 0.89   |

\*adjusted for age, height, race, BMI, pack-years of smoking, smoking status, and baseline FEV<sub>1</sub>, FVC or FEV<sub>1</sub>/FVC respectively depending on outcome. Models with LINE-1 also adjusted for % lymphocytes.

1  
2  
3 **Figure Legends**  
4

5 **Figure 1:** Distribution (median, interquartile range) of percentage a) *Alu* and b) LINE-1 methylation in the  
6 overall cohort and stratified by smoking status  
7

8 **Figure 2: *Alu* Methylation and Lung Function**

9 Bivariate associations between *Alu* methylation and FEV<sub>1</sub> %predicted, FVC %predicted and FEV<sub>1</sub>/FVC  
10

11 \* For FEV<sub>1</sub>/FVC y axis is percent, not percent predicted  
12  
13  
14  
15  
16  
17  
18  
19  
20  
21  
22  
23  
24  
25  
26  
27  
28  
29  
30  
31  
32  
33  
34  
35  
36  
37  
38  
39  
40  
41  
42  
43  
44  
45  
46  
47  
48  
49  
50  
51  
52  
53  
54  
55  
56  
57  
58  
59  
60

For peer review only

1  
2  
3 **ACKNOWLEDGMENTS:** We would like to thank all of the participants of the Normative Aging Study.  
4

5 **COMPETING INTERESTS:** None of the authors have any competing interests to report.  
6

7 **FUNDING:** Funded by NIH grants AG027214, ES015172, ES014663, HL007427, HL089438, ES015172-  
8 01 and ES000002, and VA Research and Development Service. Dr. DeMeo is supported by a Doris Duke  
9 Clinical Scientist Development Award. The Cooperative Studies Program/Epidemiology Research and  
10 Information Center of the U.S. Department of Veterans Affairs supported the VA Normative Aging Study,  
11 which is a component of the Massachusetts Veterans Epidemiology Research and Information Center,  
12 Boston, MA.  
13

14 **AUTHOR CONTRIBUTIONS:** N.E.L. designed the study, performed the data analysis, and prepared the  
15 manuscript. J.S. contributed to the data analysis and provided critical revision of the manuscript. L.T.  
16 contributed to data collection and provided critical revision of the manuscript. V.B. contributed to data  
17 collection and provided critical revision of the manuscript. D.S. and P.V. were involved in conception of  
18 the study and critical revision of the manuscript. A.Z. contributed to data collection and provided critical  
19 revision of the manuscript. J.S. contributed to study design and provided critical revision of the  
20 manuscript. A.B. contributed to data collection and provided critical revision of the manuscript. A.A.L.  
21 contributed to study design, assisted with the data analysis, and provided critical revision of the  
22 manuscript. D.L.D. designed the study, assisted with the data analysis, and provided critical revision of  
23 the manuscript.  
24  
25  
26

27 **DATA SHARING STATEMENT:** There is no additional data available.  
28  
29  
30  
31  
32  
33  
34  
35  
36  
37  
38  
39  
40  
41  
42  
43  
44  
45  
46  
47  
48  
49  
50  
51  
52  
53  
54  
55  
56  
57  
58  
59  
60

**References:**

1. Hancock DB, Eijgelsheim M, Wilk JB, et al. Meta-analyses of genome-wide association studies identify multiple loci associated with pulmonary function. *Nat Genet*;42(1):45-52.
2. Hubert HB, Fabsitz RR, Feinleib M, et al. Genetic and environmental influences on pulmonary function in adult twins. *Am Rev Respir Dis* 1982;125(4):409-15.
3. McClearn GE, Svartengren M, Pedersen NL, et al. Genetic and environmental influences on pulmonary function in aging Swedish twins. *J Gerontol* 1994;49(6):264-8.
4. Redline S, Tishler PV, Rosner B, et al. Genotypic and phenotypic similarities in pulmonary function among family members of adult monozygotic and dizygotic twins. *Am J Epidemiol* 1989;129(4):827-36.
5. Soler Artigas M, Loth DW, Wain LV, et al. Genome-wide association and large-scale follow up identifies 16 new loci influencing lung function. *Nat Genet* 2011;43(11):1082-90.
6. Ehrlich M, Gama-Sosa MA, Huang LH, et al. Amount and distribution of 5-methylcytosine in human DNA from different types of tissues of cells. *Nucleic Acids Res* 1982;10(8):2709-21.
7. Wilson AS, Power BE, Molloy PL. DNA hypomethylation and human diseases. *Biochim Biophys Acta* 2007;1775(1):138-62.
8. Bollati V, Schwartz J, Wright R, et al. Decline in genomic DNA methylation through aging in a cohort of elderly subjects. *Mech Ageing Dev* 2009;130(4):234-9.
9. Lander ES, Linton LM, Birren B, et al. Initial sequencing and analysis of the human genome. *Nature* 2001;409(6822):860-921.
10. Deininger PL, Batzer MA. Alu repeats and human disease. *Mol Genet Metab* 1999;67(3):183-93.
11. Yang AS, Estecio MR, Doshi K. A simple method for estimating global DNA methylation using bisulfite PCR of repetitive DNA elements. *Nucleic Acids Res* 2004;32(3):e38.
12. Weisenberger DJ, Campan M, Long TI, et al. Analysis of repetitive element DNA methylation by MethyLight. *Nucleic Acids Res* 2005;33(21):6823-36.
13. Gravina S, Vijg J. Epigenetic factors in aging and longevity. *Pflugers Arch* 2010;459(2):247-58.
14. Dean W, Lucifero D, Santos F. DNA methylation in mammalian development and disease. *Birth Defects Res C Embryo Today* 2005;75(2):98-111.
15. Baccarelli A, Wright R, Bollati V, et al. Ischemic heart disease and stroke in relation to blood DNA methylation. *Epidemiology* 2010;21(6):819-28.
16. Castro R, Rivera I, Struys EA, et al. Increased homocysteine and S-adenosylhomocysteine concentrations and DNA hypomethylation in vascular disease. *Clin Chem* 2003;49(8):1292-6.
17. Kim M, Long TI, Arakawa K, et al. DNA methylation as a biomarker for cardiovascular disease risk. *PLoS One* 2010;5(3):e9692.
18. Bollati V, Galimberti D, Pergoli L, et al. DNA methylation in repetitive elements and Alzheimer disease. *Brain Behav Immun* 2011.
19. Baccarelli A, Tarantini L, Wright RO, et al. Repetitive element DNA methylation and circulating endothelial and inflammation markers in the VA normative aging study. *Epigenetics* 2010;5(3).
20. Crow MK. Long interspersed nuclear elements (LINE-1): potential triggers of systemic autoimmune disease. *Autoimmunity* 2010;43(1):7-16.
21. Sood A, Petersen H, Blanchette CM, et al. Wood smoke exposure and gene promoter methylation are associated with increased risk for COPD in smokers. *Am J Respir Crit Care Med* 2010;182(9):1098-104.
22. Qiu W, Baccarelli A, Carey VJ, et al. Variable DNA methylation is associated with chronic obstructive pulmonary disease and lung function. *Am J Respir Crit Care Med* 2012;185(4):373-81.
23. Lange NE, Sordillo JE, Tarantini L, et al. Global DNA Methylation and Lung Function in the Normative Aging Study [abstract]. *Am J Respir Crit Care Med* 2011;183:A5694.

- 1
  - 2
  - 3
  - 4
  - 5
  - 6
  - 7
  - 8
  - 9
  - 10
  - 11
  - 12
  - 13
  - 14
  - 15
  - 16
  - 17
  - 18
  - 19
  - 20
  - 21
  - 22
  - 23
  - 24
  - 25
  - 26
  - 27
  - 28
  - 29
  - 30
  - 31
  - 32
  - 33
  - 34
  - 35
  - 36
  - 37
  - 38
  - 39
  - 40
  - 41
  - 42
  - 43
  - 44
  - 45
  - 46
  - 47
  - 48
  - 49
  - 50
  - 51
  - 52
  - 53
  - 54
  - 55
  - 56
  - 57
  - 58
  - 59
  - 60
24. Bell B, Rose C, Damon A. The Normative Aging Study: an interdisciplinary and longitudinal study of health and aging. *Aging and Human Development* 1972;3:5-17.
25. Madrigano J, Baccarelli A, Mittleman MA, et al. Prolonged exposure to particulate pollution, genes associated with glutathione pathways, and DNA methylation in a cohort of older men. *Environ Health Perspect* 2011;119(7):977-82.
26. Wright RO, Schwartz J, Wright RJ, et al. Biomarkers of lead exposure and DNA methylation within retrotransposons. *Environ Health Perspect* 2010;118(6):790-5.
27. Sparrow D, O'Connor G, Colton T, et al. The relationship of nonspecific bronchial responsiveness to the occurrence of respiratory symptoms and decreased levels of pulmonary function. The Normative Aging Study. *Am Rev Respir Dis* 1987;135(6):1255-60.
28. Standardization of spirometry--1987 update. Statement of the American Thoracic Society. *Am Rev Respir Dis* 1987;136(5):1285-98.
29. Standardization of Spirometry, 1994 Update. American Thoracic Society. *Am J Respir Crit Care Med* 1995;152(3):1107-36.
30. Crapo RO, Morris AH, Gardner RM. Reference spirometric values using techniques and equipment that meet ATS recommendations. *Am Rev Respir Dis* 1981;123(6):659-64.
31. Global Initiative for Chronic Obstructive Lung Disease. Global strategy for the diagnosis, management, and prevention of chronic obstructive pulmonary disease. (Updated 2010) at <http://www.goldcopd.org/Guidelineitem.asp?l1=2&l2=1&intId=989>
32. Bollati V, Baccarelli A, Hou L, et al. Changes in DNA methylation patterns in subjects exposed to low-dose benzene. *Cancer Res* 2007;67(3):876-80.
33. Baccarelli A, Wright RO, Bollati V, et al. Rapid DNA methylation changes after exposure to traffic particles. *Am J Respir Crit Care Med* 2009;179(7):572-8.
34. Zhu ZZ, Hou L, Bollati V, et al. Predictors of global methylation levels in blood DNA of healthy subjects: a combined analysis. *Int J Epidemiol* 2010.
35. Breitling LP, Yang R, Korn B, et al. Tobacco-smoking-related differential DNA methylation: 27K discovery and replication. *Am J Hum Genet* 2011;88(4):450-7.
36. Wan ES, Qiu W, Baccarelli A, et al. Cigarette smoking behaviors and time since quitting are associated with differential DNA methylation across the human genome. *Hum Mol Genet* 2012;21(13):3073-82.
37. Jintaridith P, Mutirangura A. Distinctive patterns of age-dependent hypomethylation in interspersed repetitive sequences. *Physiol Genomics* 2010;41:194-200.
38. Zhu ZZ, Sparrow D, Hou L, et al. Repetitive element hypomethylation in blood leukocyte DNA and cancer incidence, prevalence, and mortality in elderly individuals: the Normative Aging Study. *Cancer Causes Control* 2010;22(3):437-47.
39. Pilsner JR, Hu H, Ettinger A, et al. Influence of prenatal lead exposure on genomic methylation of cord blood DNA. *Environ Health Perspect* 2009;117(9):1466-71.
40. Rusiecki JA, Baccarelli A, Bollati V, et al. Global DNA hypomethylation is associated with high serum-persistent organic pollutants in Greenlandic Inuit. *Environ Health Perspect* 2008;116(11):1547-52.
41. Baccarelli A, Bollati V. Epigenetics and environmental chemicals. *Curr Opin Pediatr* 2009;21(2):243-51.
42. Valinluck V, Tsai HH, Rogstad DK, et al. Oxidative damage to methyl-CpG sequences inhibits the binding of the methyl-CpG binding domain (MBD) of methyl-CpG binding protein 2 (MeCP2). *Nucleic Acids Res* 2004;32(14):4100-8.



- 1  
2  
3  
4 43. Norris J, Fan D, Aleman C, et al. Identification of a new subclass of Alu DNA repeats which can  
5 function as estrogen receptor-dependent transcriptional enhancers. *J Biol Chem*  
6 1995;270(39):22777-82.  
7  
8 44. Vansant G, Reynolds WF. The consensus sequence of a major Alu subfamily contains a functional  
9 retinoic acid response element. *Proc Natl Acad Sci U S A* 1995;92(18):8229-33.  
10  
11 45. Asada K, Kotake Y, Asada R, et al. LINE-1 hypomethylation in a choline-deficiency-induced liver  
12 cancer in rats: dependence on feeding period. *J Biomed Biotechnol* 2006;2006(1):17142.  
13  
14 46. Batzer MA, Deininger PL. Alu repeats and human genomic diversity. *Nat Rev Genet* 2002;3(5):370-9.  
15  
16 47. Andersen ZJ, Hvidberg M, Jensen SS, et al. Chronic obstructive pulmonary disease and long-term  
17 exposure to traffic-related air pollution: a cohort study. *Am J Respir Crit Care Med*  
18 2010;183(4):455-61.  
19  
20  
21  
22  
23  
24  
25  
26  
27  
28  
29  
30  
31  
32  
33  
34  
35  
36  
37  
38  
39  
40  
41  
42  
43  
44  
45  
46  
47  
48  
49  
50  
51  
52  
53  
54  
55  
56  
57  
58  
59  
60
48. Nussbaumer-Ochsner Y, Rabe KF. Systemic manifestations of COPD. *Chest* 2011;139(1):165-73.

1  
2  
3  
4  
5  
6  
7  
8  
9 **Alu and LINE-1 Methylation and Lung Function in the Normative Aging Study**

10 **Short Title: Global Methylation and Lung Function**

11 Nancy E. Lange MD MPH,<sup>1-3</sup> Joanne Sordillo ScD<sup>1,3</sup> Letizia Tarantini BS,<sup>4</sup> Valentina Bollati PhD,<sup>4</sup> David  
12 Sparrow DSc,<sup>5</sup> Pantel Vokonas MD,<sup>5</sup> Antonella Zanobetti PhD,<sup>6</sup> Joel Schwartz PhD,<sup>6</sup> Andrea Baccarelli  
13 MD PhD,<sup>4,6</sup> Augusto A. Litonjua MD MPH<sup>1-3</sup>, Dawn L. DeMeo MD MPH<sup>1-3</sup>

14  
15 | <sup>1</sup>Channing [Laboratory Division of Network Medicine](#), <sup>2</sup>Division of Pulmonary and Critical Care Medicine,  
16 Department of Medicine, Brigham and Women's Hospital, Boston, MA, USA; <sup>3</sup>Harvard Medical School,  
17 Boston, MA, USA; <sup>4</sup>Center of Molecular and Genetic Epidemiology, Department of Environmental and  
18 Occupational Health, Università degli Studi di Milano and IRCCS Maggiore Policlinico Hospital,  
19 Mangiagalli and Regina Elena Foundation, Milan, Italy; <sup>5</sup>Veterans Administration Boston Healthcare  
20 System and Department of Medicine, Boston University School of Medicine, Boston, MA, USA; <sup>6</sup>  
21 Department of Environmental Health, Harvard School of Public Health, Boston, MA, USA.

22 Corresponding author:

23  
24 Nancy E. Lange, MD, MPH  
25 Channing Laboratory  
26 Brigham and Women's Hospital  
27 181 Longwood Avenue, room 454  
28 Boston, MA 02115, USA  
29 Phone: 617-525-0874  
30 Fax: 617-525-0958  
31 Email: [renal@channing.harvard.edu](mailto:renal@channing.harvard.edu)

32 **Key Words:** epigenetics, global methylation, FEV<sub>1</sub>, FVC, exposure

33 **Word count:**

34 Abstract: 217  
35 Manuscript: 2057  
36  
37  
38  
39  
40  
41  
42  
43  
44  
45  
46  
47  
48  
49  
50  
51  
52  
53  
54  
55  
56  
57  
58  
59  
60

1  
2  
3  
4  
5  
6  
7  
8  
9  
10  
11  
12  
13  
14  
15  
16  
17  
18  
19  
20  
21  
22  
23  
24  
25  
26  
27  
28  
29  
30  
31  
32  
33  
34  
35  
36  
37  
38  
39  
40  
41  
42  
43  
44  
45  
46  
47  
48  
49  
50  
51  
52  
53  
54  
55  
56  
57  
58  
59  
60

## ABSTRACT

**Objectives:** To investigate the association between methylation of transposable elements *Alu* and LINE-1 and lung function.

**Design:** Cohort study

**Setting:** Outpatient Veterans Administration facilities in greater Boston, MA, USA.

**Participants:** Subjects from the Veterans Administration Normative Aging Study, a longitudinal study of aging in men, evaluated between 1999 and 2007. The majority (97%) of subjects were white.

**Primary and secondary outcome measures:** Primary predictor was methylation, assessed using PCR-pyrosequencing after bisulfite treatment. Primary outcome was lung function as assessed by spirometry, performed according to ATS/ERS guidelines at the same visit as the blood draws.

**Results:** In multivariable models adjusted for age, height, BMI, pack-years of smoking, current smoking and race, *Alu* hypomethylation was associated with lower FEV<sub>1</sub> ( $\beta=28\text{ml}$  per 1% change in *Alu* methylation,  $p=.017$ ), and showed a trend towards association with a lower FVC ( $\beta=27\text{ml}$ ,  $p=.06$ ) and lower FEV<sub>1</sub>/FVC ( $\beta=0.3\%$ ,  $p=.058$ ). In multivariable models adjusted for age, height, BMI, pack-years of smoking, current smoking, % lymphocytes, race and baseline lung function, LINE-1 hypomethylation was associated with more rapid decline of FEV<sub>1</sub> ( $\beta=6.9\text{ml/yr}$  per 1% change in LINE-1 methylation,  $p=.005$ ) and of FVC ( $\beta=9.6\text{ml/yr}$ ,  $p=.002$ ).

**Conclusions:** In multiple regression analysis, *Alu* hypomethylation was associated with lower lung function, and LINE-1 hypomethylation was associated with more rapid lung function decline in a cohort of older and primarily white men from North America. Future studies should aim to replicate these findings

1  
2  
3  
4  
5  
6  
7  
8  
9 and determine if *Alu* or LINE-1 hypomethylation may be due to specific and modifiable environmental  
10 exposures.  
11

12  
13 **Article Summary:**

14  
15 **Article Focus:**

16 Association between methylation, an epigenetic marker, and lung function  
17

18 **Key Message(s):**

19 ~~Hypomethylation~~ Relative hypomethylation of transposable elements is associated with lower  
20 lung function and more rapid lung function decline in a cohort of elderlyolder North American primarily  
21 white men.  
22  
23  
24

25 **Strengths and Limitations:**

26 First study to evaluate methylation of transposable elements in relation to lung function.  
27

28 Difficult to interpret implications of methylation patterns in transposable elements.  
29  
30  
31  
32  
33  
34  
35  
36  
37  
38  
39  
40  
41  
42  
43  
44  
45  
46  
47  
48  
49  
50  
51  
52  
53  
54  
55  
56  
57  
58  
59  
60

1  
2  
3  
4  
5  
6  
7  
8  
9  
10  
11  
12  
13  
14  
15  
16  
17  
18  
19  
20  
21  
22  
23  
24  
25  
26  
27  
28  
29  
30  
31  
32  
33  
34  
35  
36  
37  
38  
39  
40  
41  
42  
43  
44  
45  
46  
47  
48  
49  
50  
51  
52  
53  
54  
55  
56  
57  
58  
59  
60

## INTRODUCTION

Lung function has both environmental and genetic determinants.<sup>1-5+4</sup> Epigenetic changes/variation, which may influence gene expression patterns without changing DNA sequence, may mediate the effects of environmental exposures on disease outcomes. DNA methylation, one type of epigenetic change, is the reversible addition of a methyl group to cytosine nucleotides. Methylation changes may or may not persist over time in the human genome, as epigenetic marks are highly plastic.

A large portion of methylation sites within the genome are found in repeat sequences and transposable elements, such as *Alu* and LINE-1 (long interspersed nuclear element) which are among the most common and best characterized repetitive elements.<sup>6-85-7</sup> *Alu* is the most abundant of the SINEs (short-interspersed nuclear elements) with over one million copies per genome.<sup>98</sup> *Alu* elements compose approximately 11% of the mass of human genome and contain 30% of its methylation sites.<sup>7,106-9</sup> LINE-1 elements are present at over half a million copies.<sup>9,118-40</sup> Methylation of repetitive elements such as *Alu* and LINE-1 has been shown to correlate with total genomic methylation content.<sup>11,12+0-11</sup> Hypomethylation in transposable elements is associated with higher genomic instability and alterations or deregulation of gene expression.<sup>13,14+2-13</sup>

Prior studies have found associations between methylation of *Alu* or LINE-1 elements and various diseases including multiple cancers,<sup>76</sup> cardiovascular disease,<sup>15-17+4-46</sup> and neurologic disease,<sup>18+7</sup> as well as with markers of inflammation,<sup>19+8</sup> and the inflammatory response.<sup>20+9</sup> Studies on gene-specific methylation and non-neoplastic lung disease have found associations between GATA4, CDKN2A (p16) and lung function and an interaction with wood smoke exposure.<sup>21+20</sup> as well as multiple genes in association with COPD presence and severity.<sup>22</sup> To our knowledge no prior study has investigated associations between methylation of transposable elements and non-neoplastic lung disease. Moreover, case-control studies such as which are common in genomic studies are more problematic for epigenetic marks since sampling cases after disease onset makes it impossible to determine whether epigenetic changes preceded or resulted from the disease. Hence cohort studies or nested case-control studies within cohorts are particularly valuable. Our aim was to examine whether methylation of the repetitive elements *Alu* and LINE-1 was associated with measures of lung function, COPD status, and longitudinal

Field Code Changed

Formatted: Superscript

1  
2  
3  
4  
5  
6  
7  
8  
9 change in lung function in a cohort of men, the Normative Aging Study. Preliminary results from these  
10 analyses were previously reported in abstract form,<sup>23,24</sup>

Field Code Changed

## 14 METHODS

### 18 Population:

19 Study participants were from the Veterans Administration Normative Aging Study, an ongoing  
20 longitudinal study of aging established in 1963.<sup>24,25</sup> This is a cohort of 2,280 healthy male volunteers from  
21 the greater Boston, MA, area who were 21–80 years of age at entry and who enrolled after an initial  
22 health screening determined that they were free of known chronic medical conditions. Participants were  
23 reevaluated every 3–5 years using detailed on-site physical examinations and questionnaires. The study  
24 was approved by the Institutional Review Boards of all participating institutions. All participants gave  
25 written informed consent.

26  
27  
28  
29  
30  
31 Prior to 1999, 706 subjects had died and others were either lost to follow-up, being followed by  
32 questionnaire only, or had no blood samples left for analyses (n=792). Seven hundred and eighty two  
33 subjects had blood samples that were available for methylation analysis resulting in 704 subjects with  
34 unique IDs and methylation data as previously described.<sup>25,26</sup> For this study, individuals evaluated at least  
35 once between January–March 1999 and June 2007 with a blood sample drawn-methylation data and  
36 concomitant spirometry were included. During the study period, this included 663 total subjects, 194 of  
37 whom reported for examination-blood draw two times, for a total of 857 samples collected. For the  
38 analysis of lung function decline, a second spirometric measurement was available on 301 subjects who  
39 had had an initial blood draw for methylation measurement.

Formatted: Superscript

### 46 Measures:

47  
48 Spirometry was performed according to ATS/ERS guidelines.<sup>29</sup> Spirometry was performed as  
49 previously described,<sup>27</sup> and was repeated up to a maximum of 8 spirometry, so that at least 3 acceptable  
50 spirometry were obtained, at least 2 of which were reproducible with FEV<sub>1</sub> and FVC measurements

Formatted: Superscript

1  
2  
3  
4  
5  
6  
7  
8  
9  
10  
11  
12  
13  
14  
15  
16  
17  
18  
19  
20  
21  
22  
23  
24  
25  
26  
27  
28  
29  
30  
31  
32  
33  
34  
35  
36  
37  
38  
39  
40  
41  
42  
43  
44  
45  
46  
47  
48  
49  
50  
51  
52  
53  
54  
55  
56  
57  
58  
59  
60

within 5% of each spirogram; the best of these 2 values was selected from a given encounter.

Acceptability of spiograms was judged according to ATS standards.<sup>28 29</sup> All spirometric values are pre-

Formatted: Superscript

bronchodilator. Percent predicted values for FEV<sub>1</sub> and FVC were calculated using equations by Crapo et

al.<sup>30 24</sup> COPD was defined as GOLD stage II or higher (FEV<sub>1</sub>/FVC < 70% and FEV<sub>1</sub> < 80% predicted).<sup>31 25</sup>

Field Code Changed

Techniques for assessing DNA methylation were previously described in detail.<sup>32 33 26 27</sup> Briefly, we

Field Code Changed

performed DNA methylation assessment of *Alu* and LINE-1 repetitive elements on bisulfite-treated blood

leukocyte DNA using highly quantitative polymerase chain reaction (PCR)-pyrosequencing technology.

The degree of methylation was expressed as the percentage of methylated cytosines over the sum of methylated and unmethylated cytosines. Each marker was tested in triplicate, and their average was used in the statistical analysis.

### Statistical Analysis

Analyses for cross-sectional associations were performed using repeated measures with adjustment for the correlation between measurements in a given individual using mixed effects models (PROC MIXED) for continuous outcomes (FEV<sub>1</sub>, FVC, FEV<sub>1</sub>/FVC) and generalized estimating equations (PROC GENMOD) for binary outcomes (COPD). Covariates in multivariable models were chosen for their clinical relevance and strong bivariate associations ( $p \leq .05$ ) with lung function or change in effect estimate criterion of >10% after addition to the model and included age, height, race, pack-years of cigarette smoking, smoking status (dichotomized as current vs. ex and never smokers) and body mass index (BMI). We also considered variables previously associated with methylation of repetitive elements.<sup>34 28</sup> such as folate intake, alcohol intake, total white blood cell count and both percent neutrophils and percent lymphocytes. With the exception of percent lymphocytes, which was included in models with LINE-1 only, these covariates were not included in final models because they were not associated with *Alu* or LINE-1 methylation and did not meet the change in estimate criteria. Because Figure 2 depicts bivariate relationships, percent predicted values were used for both FEV<sub>1</sub> and FVC to show an adjusted value; actual values for FEV<sub>1</sub> and FVC were utilized in multivariable models. To examine associations between methylation of *Alu* and LINE-1 and change in lung function over time, a rate was calculated using the change in lung function between the two time points divided by the amount of time elapsed between the

Field Code Changed

1  
2  
3  
4  
5  
6  
7  
8  
9 two measurements in years. This value was utilized as an outcome and analyzed using multivariate linear  
10 regression models. A total of 301 subjects had a second lung function data point subsequent to the initial  
11 methylation value. SAS version 9.1 (SAS Institute, Cary, NC) was used for all analyses.  
12  
13

## 14 15 16 RESULTS

17  
18 Baseline characteristics of the 663 individuals included in this study as well as of the subset of  
19 301 individuals with two lung function measures are shown in **Table 1**. All subjects were male and the  
20 majority (640, 97%) of white race. Few-Forty-three subjects (7%) were current smokers and 197 (30%)  
21 were never smokers. There was wide variation in lung function values. Of the 107 individuals with COPD,  
22 77 (72%) were GOLD stage II, 26 were stage III and 4 were stage IV; overall 20 (20%) of the individuals  
23 with COPD were current smokers.  
24  
25  
26  
27

28  
29 The distribution of percentage methylation of both *Alu* and LINE-1 elements among the  
30 population and stratified by smoking status is shown in **Figure 1**.  
31

32  
33 Bivariate relationships between *Alu* and LINE-1 methylation with outcomes and covariates  
34 considered for inclusion in the multivariable model are shown in **Table 2**. *Alu* methylation was associated  
35 or showed a trend towards association positively with FEV<sub>1</sub>, BMI and FEV<sub>1</sub>/FVC and negatively with age  
36 and COPD status. LINE-1 methylation was positively associated with current smoking and negatively  
37 with percent lymphocytes. Neither *Alu* nor LINE-1 methylation was associated with FVC, pack-years of  
38 smoking or ever smoking status. Folate intake, alcohol intake, total white blood cell count and percent  
39 neutrophils were not significantly associated with *Alu* or LINE-1 methylation in bivariate analyses. There  
40 was no significant relationship between methylation of *Alu* and LINE-1 to each other (p=.23).  
41  
42  
43  
44  
45

46  
47 In multivariate models that included age, height, race, pack-years of smoking, smoking status,  
48 and BMI, *Alu* methylation was positively associated with FEV<sub>1</sub>, FEV<sub>1</sub>/FVC and showed a trend towards  
49 association with FVC and FEV<sub>1</sub>/FVC. Because of recent data suggesting that current smoking status may  
50 have differential effects on methylation<sup>35 36</sup> and because this may relate to disease outcome or risk, we  
51 investigated whether our results would change if current smokers were excluded from the analyses.  
52  
53  
54

Field Code Changed

Formatted: Superscript



1  
2  
3  
4  
5  
6  
7  
8  
9  
10  
11  
12  
13  
14  
15  
16  
17  
18  
19  
20  
21  
22  
23  
24  
25  
26  
27  
28  
29  
30  
31  
32  
33  
34  
35  
36  
37  
38  
39  
40  
41  
42  
43  
44  
45  
46  
47  
48  
49  
50  
51  
52  
53  
54  
55  
56  
57  
58  
59  
60

Higher *Alu* methylation was still associated with lower odds of COPD (OR 0.80 [0.64, 0.99] p=.046). In analyses of lung function measures, results were in the same direction but were no longer significant except for FEV<sub>1</sub>/FVC (FEV<sub>1</sub> p=0.17, FVC p=0.7, FEV<sub>1</sub>/FVC p=.029).

When analyzed excluding current smokers, there was a negative association between *Alu* and COPD (higher *Alu* with lower odds of COPD) that was statistically significant (OR 0.80 [0.64, 0.99] p=.046).

There were no significant associations between LINE-1 methylation and any of the cross-sectional outcomes. (Table 3). Figure 2 depicts the bivariate associations of *Alu* methylation with FEV<sub>1</sub> % predicted, FVC % predicted and FEV<sub>1</sub>/FVC.

We also analyzed whether methylation of *Alu* and LINE-1 were associated with rate of change in lung function in a subset of participants who had two consecutive lung function measures (N=301). The mean number of years elapsed between measurements was 4.03 (SD 1.23). Models were adjusted for baseline FEV<sub>1</sub>, FVC or FEV<sub>1</sub>/FVC (respectively for the given outcome) as well as age, pack-years of smoking, BMI, height, race, percent lymphocytes and smoking status. Relative hypomethylation in LINE-1 but not *Alu* was associated negatively with rate of change with faster rate of decline in FEV<sub>1</sub> and FVC (p<.005). Neither measure was associated with rate of change of FEV<sub>1</sub>/FVC. (Table 4) Including both *Alu* and LINE-1 methylation in the models did not change the results (data not shown). Because of prior associations between methylation of repetitive elements and cardiovascular disease<sup>15-17</sup>, we repeated both cross-sectional and longitudinal analyses including variables for cardiovascular disease (myocardial infarction, stroke, angina, hypertension, ischemic heart disease) and diabetes and found no difference in the results (data not shown). Analyses were also repeated in whites only to determine whether results might be due to population stratification and results did not change (data not shown). Analyses excluding current smokers remained significant (data not shown).

## DISCUSSION

We examined associations between methylation levels of the repetitive elements *Alu* and LINE-1 in a cohort of elderly men in relation to lung function and COPD status. In cross-sectional analyses, we found that *Alu* hypomethylation was associated with lower FEV<sub>1</sub> with a trend towards association with

Formatted: Subscript

Formatted: Subscript

Formatted: Superscript

Field Code Changed

lower FVC and FEV<sub>1</sub>/FVC. LINE-1 hypomethylation was associated with more rapid lung function decline (FEV<sub>1</sub> and FVC).

Prior studies have found associations between methylation of repetitive transposable elements such as *Alu* and LINE-1 and several diseases including multiple cancers,<sup>76</sup> cardiovascular disease,<sup>15-17,14-16</sup> and neurologic disease,<sup>18,17</sup> as well as with markers of inflammation.<sup>19,18</sup> To our knowledge this is the first study to examine associations between methylation of *Alu* and LINE-1 transposable elements and measures of lung function.

Previous work has shown that in normal subjects, *Alu* hypomethylation is associated with increased age,<sup>8,378-34</sup> greater alcohol use and gender (lower in males),<sup>34,28</sup> In this same cohort (NAS), hypomethylation has been associated with higher incidence of cancer in general and lung cancer specifically (LINE-1 [methylation](#)), as well as higher mortality from cancer (*Alu* and LINE-1 [methylation](#)).<sup>38,35</sup> A variety of environmental exposures such as lead,<sup>39,36</sup> traffic particles,<sup>33,27</sup> organic pollutants,<sup>40,37</sup> metals, air pollutants and endocrine disrupting agents,<sup>41,38</sup> may all affect global methylation levels, specifically some that may relate to lung function such as various air pollutants.

Hypomethylation of transposable elements may or may not be causally linked to lower lung function and faster rates of lung function decline. Lower methylation of *Alu* and LINE-1 may increase their activity as retrotransposable sequences, leading to greater genomic instability and more mutations.<sup>13,42</sup> Furthermore, oxidative damage caused by environmental exposures may cause hypomethylation.<sup>42,39</sup> This may lead to alteration of gene expression through a variety of mechanisms including disrupting transcription factor binding sites or reading frames, altering regulatory sequences, altering methylation patterns of gene promoters, or introducing new transcription factor binding sites.<sup>43-45,40-42</sup> *Alu* elements specifically are preferentially found in gene-rich regions.<sup>46,43</sup> Black carbon and increased PM<sub>2.5</sub> exposure,<sup>33,27</sup> as well as PM<sub>10</sub> exposure,<sup>41,38</sup> have been found to be inversely associated with LINE-1 [methylation](#) and both *Alu* and LINE-1 methylation, respectively which may impact lung function or lung function decline.<sup>47,44</sup> LINE-1 hypomethylation may also increase transcription of genes that have LINE-1 in regulatory regions. It is possible that other specific environmental or dietary exposures previously not known to be associated with lung function may be mediated through epigenetic changes such as *Alu* or LINE-1 hypomethylation. Alternatively, this may be a marker of a specific exposure but not causally

Field Code Changed

1  
2  
3  
4  
5  
6  
7  
8  
9  
10  
11  
12  
13  
14  
15  
16  
17  
18  
19  
20  
21  
22  
23  
24  
25  
26  
27  
28  
29  
30  
31  
32  
33  
34  
35  
36  
37  
38  
39  
40  
41  
42  
43  
44  
45  
46  
47  
48  
49  
50  
51  
52  
53  
54  
55  
56  
57  
58  
59  
60

linked to lower lung function. Lastly, because *Alu* methylation decreases with increasing age, as does lung function, our findings may represent some other measure of 'aging' or exposures resulting in similar processes beyond just chronological age.<sup>87</sup> As our understanding of epigenetic processes and the exposures that affect these processes increases, the implications of our findings will become clearer.

Field Code Changed

These data must be interpreted in the context of the study design. Our study was limited to elderly men the majority of whom were white, and our findings may or may not be generalizable to other populations. It is difficult to know how to interpret methylation of retrotransposons, as opposed to gene-specific methylation, in relation to specific outcomes such as lung function and lung function decline. Future studies [in this and other cohorts](#) should include gene-specific methylation analyses [similar to Qiu et al.<sup>22</sup>](#) to elucidate mechanisms by which methylation changes may relate to these outcomes. We did not control for a variety of environmental exposures that may be associated with both lung function and methylation. However, alteration in methylation patterns may be the pathway through which these changes are mediated and thus including these exposures in multivariate models would be overadjusting. Methylation levels vary in different tissue types and it is possible that assessments of methylation in white blood cells may not reflect alterations seen in lung tissue. However, systemic processes involving white blood cells, such as inflammation, may play a role in the pathophysiology of lung function decline<sup>48,46</sup> and may nonetheless be markers of specific exposures (such as cigarette smoking) that exert a systemic effect.

Formatted: Font: Italic

Formatted: Superscript

Field Code Changed

Field Code Changed

In summary, we found that relative hypomethylation of *Alu* was associated with lower lung function measures, and that LINE-1 hypomethylation was associated with more rapid lung function decline. Future studies on both gene-specific methylation as well as exposures related to methylation of retrotransposons will improve our understanding of the relationship between epigenetic changes and lung function, potentially informing new diagnostic and therapeutic approaches to lung function decline [and diseases such as COPD](#).

**Table 1:** Baseline characteristics of 663 individuals from the Normative Aging Study and subset of 301 individuals who had more than one lung function measurement for analysis of lung function decline

|                             | Mean (SD)<br>or N (%) | Range        |
|-----------------------------|-----------------------|--------------|
| <b>Age</b>                  | 72.7 (6.7)            | (55.3-100.9) |
| <b>BMI</b>                  | 28.5 (4.2)            | (19.4-52.3)  |
| <b>Pack-years*</b>          | 30.6 (24.8)           | (0.1-145.5)  |
| <b>Current smokers</b>      | 43 (7%)               | -            |
| <b>Ever-smokers</b>         | 466 (70%)             | -            |
| <b>FEV<sub>1</sub></b>      | 2.70 (.64)            | (.85-4.69)   |
| <b>FEV<sub>1</sub>%pred</b> | 81 (17)               | (28-125)     |
| <b>FVC</b>                  | 3.56 (0.72)           | (1.63-6.32)  |
| <b>FVC%pred</b>             | 82 (14)               | (43-124)     |
| <b>FEV<sub>1</sub>/FVC</b>  | 75 (8)                | (36-94)      |
| <b>COPD</b>                 | 107 (16%)             | -            |
| <b>Alu</b>                  | 26.4 (1.1)            | (22.8-32.4)  |
| <b>LINE-1</b>               | 76.8 (1.8)            | (70.1-84.6)  |

1  
2  
3  
4  
5  
6  
7  
8  
9  
10  
11  
12  
13  
14  
15  
16  
17  
18  
19  
20  
21  
22  
23  
24  
25  
26  
27  
28  
29  
30  
31  
32  
33  
34  
35  
36  
37  
38  
39  
40  
41  
42  
43  
44  
45  
46  
47  
48  
49  
50  
51  
52  
53  
54  
55  
56  
57  
58  
59  
60

|                                          | Full data set         |                | 301 subset            |                |
|------------------------------------------|-----------------------|----------------|-----------------------|----------------|
|                                          | Mean (SD) or<br>N (%) | Range          | Mean (SD) or<br>N (%) | Range          |
| Age                                      | 72.7 (6.7)            | (55.3-100.9)   | 71.5 (6.4)            | (55.3-91.0)    |
| BMI                                      | 28.5 (4.2)            | (19.4-52.3)    | 28.7 (4.1)            | (20.3-52.3)    |
| Pack-years*                              | 30.6 (24.8)           | (0.1-145.5)    | 28.6 (23.1)           | (0.10-120.8)   |
| Current smokers                          | 43 (7%)               |                | 23 (8%)               |                |
| Ever smokers                             | 466 (70%)             |                | 216 (70%)             |                |
| Folate intake <sup>†</sup> (mcg/day)     | 570 (333)             | (0.23-2235.17) | 617 (383)             | (0.23-2001.75) |
| Alcohol intake (gm/day)                  | 12.0 (17.8)           | (0-217.8)      | 10.7 (13.8)           | (0-73.5)       |
| WBC (x10 <sup>3</sup> /mm <sup>3</sup> ) | 6.7 (1.8)             | (2.7-23.8)     | 6.6 (2.3)             | (3.2-36.6)     |
| % lymphocytes                            | 25.6 (8.0)            | (5-88)         | 25.0 (8.3)            | (7-85)         |
| % neutrophils                            | 62.1 (8.7)            | (5-85)         | 62.8 (8.8)            | (5-83)         |
| Cardiovascular Disease <sup>‡</sup>      | 115 (17%)             |                | 49 (16%)              |                |
| Hypertension                             | 280 (42%)             |                | 143 (47%)             |                |
| Diabetes                                 | 75 (11%)              |                | 33 (11%)              |                |
| FEV <sub>1</sub>                         | 2.70 (.64)            | (.85-4.69)     | 2.76 (0.62)           | (1.29-4.69)    |
| FEV <sub>1</sub> %pred                   | 81 (17)               | (28-125)       | 81.8 (15.5)           | (39.7-122.6)   |
| FVC                                      | 3.56 (0.72)           | (1.63-6.32)    | 3.64 (0.71)           | (1.63-6.32)    |
| FVC%pred                                 | 82 (14)               | (43-124)       | 82.6 (13.1)           | (43.8-123.8)   |
| FEV <sub>1</sub> /FVC                    | 75 (8)                | (36-94)        | 75.6 (7.0)            | (51.6-94.4)    |
| COPD                                     | 107 (16%)             |                | 45 (15%)              |                |
| Alu                                      | 26.4 (1.1)            | (22.8-32.4)    | 26.4 (1.10)           | (22.8-32.3)    |
| LINE-1                                   | 76.8 (1.8)            | (70.1-84.6)    | 77.0 (1.8)            | (70.1-81.6)    |

\*pack-years in current or ex-smokers only

<sup>†</sup>calculated based on supplement intake and fortified foods from food frequency questionnaire

<sup>‡</sup>angina, stroke, myocardial infarction, ischemic heart disease

**Table 2:** Bivariate associations between *Alu*, LINE-1 [methylation](#) and other covariates

|                       | <i>Alu</i>         |         | LINE-1           |         |
|-----------------------|--------------------|---------|------------------|---------|
|                       | $\beta$            | p value | $\beta$          | p value |
| Age                   | -0.3               | 0.07    | -0.2             | 0.1     |
| BMI                   | 0.106              | 0.059   | 0.054            | 0.17    |
| Current smoking       | 0.35               | 0.14    | 0.697            | 0.0002  |
| % Lymphocytes         | 0.08               | 0.73    | -0.31            | 0.04    |
| FEV <sub>1</sub>      | 0.024              | 0.06    | -0.006           | 0.53    |
| FEV <sub>1</sub> /FVC | 0.31               | 0.046   | -0.05            | 0.67    |
| COPD                  | OR .87 [.73, 1.03] | 0.1     | 1.02 [.92, 1.13] | 0.76    |

  

|                       | <i>Alu</i>         |         | LINE-1           |         |
|-----------------------|--------------------|---------|------------------|---------|
|                       | $\beta$            | p value | $\beta$          | p value |
| Age                   | -0.3               | 0.07    | -0.2             | 0.1     |
| BMI                   | 0.106              | 0.059   | 0.054            | 0.17    |
| Current smoking       | 0.35               | 0.14    | 0.697            | 0.0002  |
| % Lymphocytes         | 0.08               | 0.73    | -0.31            | 0.04    |
| FEV <sub>1</sub>      | 0.024              | 0.06    | -0.006           | 0.53    |
| FVC                   | 0.023              | 0.22    | -0.004           | 0.73    |
| FEV <sub>1</sub> /FVC | 0.31               | 0.046   | -0.05            | 0.67    |
| COPD                  | OR .87 [.73, 1.03] | 0.1     | 1.02 [.92, 1.13] | 0.76    |

1  
2  
3  
4  
5  
6  
7  
8  
9  
10  
11  
12  
13  
14  
15  
16  
17  
18  
19  
20  
21  
22  
23  
24  
25  
26  
27  
28  
29  
30  
31  
32  
33  
34  
35  
36  
37  
38  
39  
40  
41  
42  
43  
44  
45  
46  
47  
48  
49  
50  
51  
52  
53  
54  
55  
56  
57  
58  
59  
60**Table 3:** Multivariate models for lung function and both *Alu* and LINE-1 methylation\*

|                       | <i>Alu</i>        |         | LINE-1           |         |
|-----------------------|-------------------|---------|------------------|---------|
|                       | $\beta$           | p value | $\beta$          | p value |
| FEV <sub>1</sub>      | 0.028             | 0.017   | -0.015           | 0.08    |
| FVC                   | 0.027             | 0.06    | -0.017           | 0.11    |
| FEV <sub>1</sub> /FVC | 0.3               | 0.057   | -0.092           | 0.44    |
| COPD                  | 0.85 [0.71, 1.03] | 0.09    | 1.01 [.89, 1.15] | 0.83    |

\*adjusted for age, height, race, BMI, pack-years of smoking, smoking status. Models with LINE-1 also include % lymphocytes.

**Table 4:** Multivariate models for rate of change in lung function (in liters/yr) and both *Alu* and LINE-1 methylation\*

|            | FEV <sub>1</sub> rate |       | FVC rate |        | ratio rate |       |
|------------|-----------------------|-------|----------|--------|------------|-------|
|            | $\beta$               | p val | $\beta$  | p val  | $\beta$    | p val |
| <i>Alu</i> | -0.0028               | 0.49  | -0.00098 | 0.84   | -0.00079   | 0.17  |
| LINE-1     | -0.0069               | 0.005 | -0.0096  | 0.0021 | 0.00005    | 0.89  |

  

|                       | <i>Alu</i> |       | LINE-1  |        |
|-----------------------|------------|-------|---------|--------|
|                       | $\beta$    | p val | $\beta$ | p val  |
| FEV <sub>1</sub> rate | -0.0028    | 0.49  | -0.0069 | 0.005  |
| FVC rate              | -0.00098   | 0.84  | -0.0096 | 0.0021 |
| ratio rate            | -0.00079   | 0.17  | 0.00005 | 0.89   |

\*adjusted for age, height, race, BMI, pack-years of smoking, smoking status, and baseline FEV<sub>1</sub>, FVC or FEV<sub>1</sub>/FVC respectively depending on outcome. Models with LINE-1 also adjusted for % lymphocytes.



1  
2  
3  
4  
5  
6  
7  
8  
9  
10  
11  
12  
13  
14  
15  
16  
17  
18  
19  
20  
21  
22  
23  
24  
25  
26  
27  
28  
29  
30  
31  
32  
33  
34  
35  
36  
37  
38  
39  
40  
41  
42  
43  
44  
45  
46  
47  
48  
49  
50  
51  
52  
53  
54  
55  
56  
57  
58  
59  
60

**Figure Legends**

**Figure 1:** Distribution (median, interquartile range) of percentage a) *Alu* and b) LINE-1 methylation in the overall cohort and stratified by smoking status

**Figure 2: *Alu* Methylation and Lung Function**  
Bivariate associations between *Alu* and FEV<sub>1</sub>%predicted, FVC%predicted and FEV<sub>1</sub>/FVC

\* For FEV<sub>1</sub>/FVC y axis is percent, not percent predicted

For peer review only

1  
2  
3  
4  
5  
6  
7  
8  
9 **ACKNOWLEDGMENTS:** We would like to thank all of the participants of the Normative Aging Study.

10 **COMPETING INTERESTS:** None of the authors have any competing interests to report.

11  
12 **FUNDING:** Funded by NIH grants AG027214, ES015172, ES014663, HL007427, HL089438, ES015172-  
13 01 and ES000002, and VA Research and Development Service. Dr. DeMeo is supported by a Doris Duke  
14 Clinical Scientist Development Award. The Cooperative Studies Program/Epidemiology Research and  
15 Information Center of the U.S. Department of Veterans Affairs supported the VA Normative Aging Study,  
16 which is a component of the Massachusetts Veterans Epidemiology Research and Information Center,  
17 Boston, MA.

18 **AUTHOR CONTRIBUTIONS:** N.E.L. designed the study, performed the data analysis, and prepared the  
19 manuscript. J.S. contributed to the data analysis and provided critical revision of the manuscript. L.T.  
20 contributed to data collection and provided critical revision of the manuscript. V.B. contributed to data  
21 collection and provided critical revision of the manuscript. D.S. and P.V. were involved in conception of  
22 the study and critical revision of the manuscript. A.Z. contributed to data collection and provided critical  
23 revision of the manuscript. J.S. contributed to study design and provided critical revision of the  
24 manuscript. A.B. contributed to data collection and provided critical revision of the manuscript. A.A.L.  
25 contributed to study design, assisted with the data analysis, and provided critical revision of the  
26 manuscript. D.L.D. designed the study, assisted with the data analysis, and provided critical revision of  
27 the manuscript.  
28  
29  
30  
31  
32  
33  
34  
35  
36  
37  
38  
39  
40  
41  
42  
43  
44  
45  
46  
47  
48  
49  
50  
51  
52  
53  
54  
55  
56  
57  
58  
59  
60

## References:

- 1  
2  
3  
4  
5  
6  
7  
8  
9  
10  
11  
12  
13  
14  
15  
16  
17  
18  
19  
20  
21  
22  
23  
24  
25  
26  
27  
28  
29  
30  
31  
32  
33  
34  
35  
36  
37  
38  
39  
40  
41  
42  
43  
44  
45  
46  
47  
48  
49  
50  
51  
52  
53  
54  
55  
56  
57  
58  
59  
60
1. Hancock DB, Eijgelsheim M, Wilk JB, Gharib SA, Loehr LR, Marciano KD, et al. Meta-analyses of genome-wide association studies identify multiple loci associated with pulmonary function. *Nat Genet*;42(1):45-52. Formatted: Font: Calibri, 11 pt  
Formatted: Font: Calibri, 11 pt, Italic
  2. Hubert HB, Fabsitz RR, Feinleib M, Gwinn C. Genetic and environmental influences on pulmonary function in adult twins. *Am Rev Respir Dis* 1982;125(4):409-15. Formatted: Font: Calibri, 11 pt, Italic
  3. McClern GE, Svartengren M, Pedersen NL, Heller DA, Plomin R. Genetic and environmental influences on pulmonary function in aging Swedish twins. *J Gerontol* 1994;49(6):264-8. Formatted: Font: Calibri, 11 pt  
Formatted: Font: Calibri, 11 pt, Italic
  4. Redline S, Tishler PV, Rosner B, Lewitter F, Vandenberg M, Weiss ST, et al. Genotypic and phenotypic similarities in pulmonary function among family members of adult monozygotic and dizygotic twins. *Am J Epidemiol* 1989;129(4):827-36. Formatted: Font: Calibri, 11 pt  
Formatted: Font: Calibri, 11 pt, Italic
  5. Soler Artigas M, Loth DW, Wain LV, Gharib SA, Obeidat M, Tang W, et al. Genome-wide association and large-scale follow up identifies 16 new loci influencing lung function. *Nat Genet* 2011;43(11):1082-90. Formatted: Font: Calibri, 11 pt  
Formatted: Font: Calibri, 11 pt, Italic
  6. Ehrlich M, Gama-Sosa MA, Huang LH, Midgett RM, Kuo KC, McCune RA, et al. Amount and distribution of 5-methylcytosine in human DNA from different types of tissues of cells. *Nucleic Acids Res* 1982;10(8):2709-21. Formatted: Font: Calibri, 11 pt  
Formatted: Font: Calibri, 11 pt, Italic
  7. Wilson AS, Power BE, Molloy PL. DNA hypomethylation and human diseases. *Biochim Biophys Acta* 2007;1775(1):138-62. Formatted: Font: Calibri, 11 pt  
Formatted: Font: Calibri, 11 pt, Italic
  8. Bollati V, Schwartz J, Wright R, Litonjua A, Tarantini L, Suh H, et al. Decline in genomic DNA methylation through aging in a cohort of elderly subjects. *Mech Ageing Dev* 2009;130(4):234-9. Formatted: Font: Calibri, 11 pt  
Formatted: Font: Calibri, 11 pt, Italic
  9. Lander ES, Linton LM, Birren B, Nusbaum C, Zody MC, Baldwin J, et al. Initial sequencing and analysis of the human genome. *Nature* 2001;409(6822):860-921. Formatted: Font: Calibri, 11 pt  
Formatted: Font: Calibri, 11 pt, Italic
  10. Deininger PL, Batzer MA. Alu repeats and human disease. *Mol Genet Metab* 1999;67(3):183-93. Formatted: Font: Calibri, 11 pt, Italic
  11. Yang AS, Estecio MR, Doshi K, Kondo Y, Tajara EH, Issa JP. A simple method for estimating global DNA methylation using bisulfite PCR of repetitive DNA elements. *Nucleic Acids Res* 2004;32(3):e38. Formatted: Font: Calibri, 11 pt
  12. Weisenberger DJ, Campan M, Long TI, Kim M, Woods C, Fiala E, et al. Analysis of repetitive element DNA methylation by MethyLight. *Nucleic Acids Res* 2005;33(21):6823-36. Formatted: Font: Calibri, 11 pt  
Formatted: Font: Calibri, 11 pt, Italic
  13. Gravina S, Vijg J. Epigenetic factors in aging and longevity. *Pflugers Arch* 2010;459(2):247-58. Formatted: Font: Calibri, 11 pt  
Formatted: Font: Calibri, 11 pt, Italic
  14. Dean W, Lucifero D, Santos F. DNA methylation in mammalian development and disease. *Birth Defects Res C Embryo Today* 2005;75(2):98-111. Formatted: Font: Calibri, 11 pt  
Formatted: Font: Calibri, 11 pt, Italic
  15. Baccarelli A, Wright R, Bollati V, Litonjua A, Zanobetti A, Tarantini L, et al. Ischemic heart disease and stroke in relation to blood DNA methylation. *Epidemiology* 2010;21(6):819-28. Formatted: Font: Calibri, 11 pt  
Formatted: Font: Calibri, 11 pt, Italic
  16. Castro R, Rivera I, Struys EA, Jansen EE, Ravasco P, Camilo ME, et al. Increased homocysteine and S-adenosylhomocysteine concentrations and DNA hypomethylation in vascular disease. *Clin Chem* 2003;49(8):1292-6. Formatted: Font: Calibri, 11 pt  
Formatted: Font: Calibri, 11 pt, Italic
  17. Kim M, Long TI, Arakawa K, Wang R, Yu MC, Laird PW. DNA methylation as a biomarker for cardiovascular disease risk. *PLoS One* 2010;5(3):e9692. Formatted: Font: Calibri, 11 pt  
Formatted: Font: Calibri, 11 pt, Italic
  18. Bollati V, Galimberti D, Pergoli L, Dalla Valle E, Barretta F, Cortini F, et al. DNA methylation in repetitive elements and Alzheimer disease. *Brain Behav Immun* 2011. Formatted: Font: Calibri, 11 pt  
Formatted: Font: Calibri, 11 pt, Italic
  19. Baccarelli A, Tarantini L, Wright RO, Bollati V, Litonjua AA, Zanobetti A, et al. Repetitive element DNA methylation and circulating endothelial and inflammation markers in the VA normative aging study. *Epigenetics* 2010;5(3). Formatted: Font: Calibri, 11 pt  
Formatted: Font: Calibri, 11 pt, Italic
  20. Crow MK. Long interspersed nuclear elements (LINE-1): potential triggers of systemic autoimmune disease. *Autoimmunity* 2010;43(1):7-16. Formatted: Font: Calibri, 11 pt  
Formatted: Font: Calibri, 11 pt, Italic  
Formatted: Font: Calibri, 11 pt  
Formatted: Font: Calibri, 11 pt, Italic  
Formatted: Font: Calibri, 11 pt

21. Sood A, Petersen H, Blanchette CM, Meek P, Picchi MA, Belinsky SA, et al. Wood smoke exposure and gene promoter methylation are associated with increased risk for COPD in smokers. *Am J Respir Crit Care Med* 2010;182(9):1098-104. **Formatted:** Font: Calibri, 11 pt, Italic
22. Qiu W, Baccarelli A, Carey VJ, Boutaoui N, Bacherman H, Klanderman B, et al. Variable DNA methylation is associated with chronic obstructive pulmonary disease and lung function. *Am J Respir Crit Care Med* 2012;185(4):373-81. **Formatted:** Font: Calibri, 11 pt, Italic
23. Lange NE, Sordillo JE, Tarantini L, Bollati V, Sparrow D, Vokonas P, et al. Global DNA Methylation and Lung Function in the Normative Aging Study [abstract]. *Am J Respir Crit Care Med* 2011;183:A5694. **Formatted:** Font: Calibri, 11 pt, Italic
24. Bell B, Rose C, Damon A. The Normative Aging Study: an interdisciplinary and longitudinal study of health and aging. *Aging and Human Development* 1972;3:5-17. **Formatted:** Font: Calibri, 11 pt, Italic
25. Madrigano J, Baccarelli A, Mittleman MA, Wright RO, Sparrow D, Vokonas PS, et al. Prolonged exposure to particulate pollution, genes associated with glutathione pathways, and DNA methylation in a cohort of older men. *Environ Health Perspect* 2011;119(7):977-82. **Formatted:** Font: Calibri, 11 pt
26. Wright RO, Schwartz J, Wright RJ, Bollati V, Tarantini L, Park SK, et al. Biomarkers of lead exposure and DNA methylation within retrotransposons. *Environ Health Perspect* 2010;118(6):790-5. **Formatted:** Font: Calibri, 11 pt, Italic
27. Sparrow D, O'Connor G, Colton T, Barry CL, Weiss ST. The relationship of nonspecific bronchial responsiveness to the occurrence of respiratory symptoms and decreased levels of pulmonary function. The Normative Aging Study. *Am Rev Respir Dis* 1987;135(6):1255-60. **Formatted:** Font: Calibri, 11 pt
28. Standardization of spirometry—1987 update. Statement of the American Thoracic Society. *Am Rev Respir Dis* 1987;136(5):1285-98. **Formatted:** Font: Calibri, 11 pt, Italic
29. Standardization of Spirometry, 1994 Update. American Thoracic Society. *Am J Respir Crit Care Med* 1995;152(3):1107-36. **Formatted:** Font: Calibri, 11 pt, Italic
30. Crapo RO, Morris AH, Gardner RM. Reference spirometric values using techniques and equipment that meet ATS recommendations. *Am Rev Respir Dis* 1981;123(6):659-64. **Formatted:** Font: Calibri, 11 pt
31. Global Initiative for Chronic Obstructive Lung Disease. Global strategy for the diagnosis, management, and prevention of chronic obstructive pulmonary disease. (Updated 2010) at <http://www.goldcopd.org/Guidelineitem.asp?l1=2&l2=1&intId=989>. **Formatted:** Hyperlink, Font: (Default) Calibri, 11 pt
32. Bollati V, Baccarelli A, Hou L, Bonzini M, Fustinoni S, Cavallo D, et al. Changes in DNA methylation patterns in subjects exposed to low-dose benzene. *Cancer Res* 2007;67(3):876-80. **Formatted:** Font: Calibri, 11 pt, Italic
33. Baccarelli A, Wright RO, Bollati V, Tarantini L, Litonjua AA, Suh HH, et al. Rapid DNA methylation changes after exposure to traffic particles. *Am J Respir Crit Care Med* 2009;179(7):572-8. **Formatted:** Font: Calibri, 11 pt
34. Zhu ZZ, Hou L, Bollati V, Tarantini L, Marinelli B, Cantone L, et al. Predictors of global methylation levels in blood DNA of healthy subjects: a combined analysis. *Int J Epidemiol* 2010. **Formatted:** Font: Calibri, 11 pt, Italic
35. Breitling LP, Yang R, Korn B, Burwinkel B, Brenner H. Tobacco-smoking-related differential DNA methylation: 27K discovery and replication. *Am J Hum Genet* 2011;88(4):450-7. **Formatted:** Font: Calibri, 11 pt, Italic
36. Wan ES, Qiu W, Baccarelli A, Carey VJ, Bacherman H, Rennard SI, et al. Cigarette smoking behaviors and time since quitting are associated with differential DNA methylation across the human genome. *Hum Mol Genet* 2012;21(13):3073-82. **Formatted:** Font: Calibri, 11 pt, Italic
37. Jantaridh P, Mutirangura A. Distinctive patterns of age-dependent hypomethylation in interspersed repetitive sequences. *Physiol Genomics* 2010;41:194-200. **Formatted:** Font: Calibri, 11 pt, Italic
38. Zhu ZZ, Sparrow D, Hou L, Tarantini L, Bollati V, Litonjua AA, et al. Repetitive element hypomethylation in blood leukocyte DNA and cancer incidence, prevalence, and mortality in elderly individuals: the Normative Aging Study. *Cancer Causes Control* 2010;22(3):437-47. **Formatted:** Font: Calibri, 11 pt, Italic
39. Pilsner JR, Hu H, Ettinger A, Sanchez BN, Wright RO, Cantonwine D, et al. Influence of prenatal lead exposure on genomic methylation of cord blood DNA. *Environ Health Perspect* 2009;117(9):1466-71. **Formatted:** Font: Calibri, 11 pt, Italic

1  
2  
3  
4  
5  
6  
7  
8  
9  
10  
11  
12  
13  
14  
15  
16  
17  
18  
19  
20  
21  
22  
23  
24  
25  
26  
27  
28  
29  
30  
31  
32  
33  
34  
35  
36  
37  
38  
39  
40  
41  
42  
43  
44  
45  
46  
47  
48  
49  
50  
51  
52  
53  
54  
55  
56  
57  
58  
59  
60

40. Rusiecki JA, Baccarelli A, Bollati V, Tarantini L, Moore LE, Bonfeld-Jorgensen EC. Global DNA hypomethylation is associated with high serum-persistent organic pollutants in Greenlandic Inuit. *Environ Health Perspect* 2008;116(11):1547-52.
41. Baccarelli A, Bollati V. Epigenetics and environmental chemicals. *Curr Opin Pediatr* 2009;21(2):243-51.
42. Valinluck V, Tsai HH, Rogstad DK, Burdzy A, Bird A, Sowers LC. Oxidative damage to methyl-CpG sequences inhibits the binding of the methyl-CpG binding domain (MBD) of methyl-CpG binding protein 2 (MeCP2). *Nucleic Acids Res* 2004;32(14):4100-8.
43. Norris J, Fan D, Aleman C, Marks JR, Futreal PA, Wiseman RW, et al. Identification of a new subclass of Alu DNA repeats which can function as estrogen receptor-dependent transcriptional enhancers. *J Biol Chem* 1995;270(39):22777-82.
44. Vansant G, Reynolds WF. The consensus sequence of a major Alu subfamily contains a functional retinoic acid response element. *Proc Natl Acad Sci U S A* 1995;92(18):8229-33.
45. Asada K, Kotake Y, Asada R, Saunders D, Broyles RH, Towner RA, et al. LINE-1 hypomethylation in a choline-deficiency-induced liver cancer in rats: dependence on feeding period. *J Biomed Biotechnol* 2006;2006(1):17142.
46. Batzer MA, Deininger PL. Alu repeats and human genomic diversity. *Nat Rev Genet* 2002;3(5):370-9.
47. Andersen ZJ, Hvidberg M, Jensen SS, Ketzler M, Loft S, Sorensen M, et al. Chronic obstructive pulmonary disease and long-term exposure to traffic-related air pollution: a cohort study. *Am J Respir Crit Care Med* 2010;183(4):455-61.
48. Nussbaumer-Ochsner Y, Rabe KF. Systemic manifestations of COPD. *Chest* 2011;139(1):165-73.
1. Hancock DB, Eijgelsheim M, Wilk JB, Gharib SA, Loehr LR, Marcicante KD, et al. Meta-analyses of genome-wide association studies identify multiple loci associated with pulmonary function. *Nat Genet* 42(1):45-52.
2. Hubert HB, Fabsitz RR, Feinleib M, Gwinn C. Genetic and environmental influences on pulmonary function in adult twins. *Am Rev Respir Dis* 1982;125(4):409-15.
3. McClearn GE, Svartengren M, Pedersen NL, Heller DA, Plomin R. Genetic and environmental influences on pulmonary function in aging Swedish twins. *J Gerontol* 1994;49(6):264-8.
4. Redline S, Tishler PV, Rosner B, Lewitter FI, Vandenburg M, Weiss ST, et al. Genotypic and phenotypic similarities in pulmonary function among family members of adult monozygotic and dizygotic twins. *Am J Epidemiol* 1989;129(4):827-36.
5. Soler Artigas M, Loth DW, Wain LV, Gharib SA, Obeidat M, Tang W, et al. Genome-wide association and large-scale follow up identifies 16 new loci influencing lung function. *Nat Genet* 2011;43(11):1082-90.
6. Ehrlich M, Gama Sosa MA, Huang LH, Midgett RM, Kuo KC, McCune RA, et al. Amount and distribution of 5-methylcytosine in human DNA from different types of tissues of cells. *Nucleic Acids Res* 1982;10(8):2709-21.
7. Wilson AS, Power BE, Molloy PL. DNA hypomethylation and human diseases. *Biochim Biophys Acta* 2007;1775(1):138-62.
8. Bollati V, Schwartz J, Wright R, Litonjua A, Tarantini L, Suh H, et al. Decline in genomic DNA methylation through aging in a cohort of elderly subjects. *Mech Ageing Dev* 2009;130(4):234-9.
9. Lander ES, Linton LM, Birren B, Nusbaum C, Zody MC, Baldwin J, et al. Initial sequencing and analysis of the human genome. *Nature* 2001;409(6822):860-921.
10. Deininger PL, Batzer MA. Alu repeats and human disease. *Mol Genet Metab* 1999;67(3):183-93.
11. Yang AS, Estecio MR, Doshi K, Kondo Y, Tajara EH, Issa JP. A simple method for estimating global DNA methylation using bisulfite-PCR of repetitive DNA elements. *Nucleic Acids Res* 2004;32(3):e38.

Formatted: Font: Calibri, 11 pt, Italic

Formatted: Font: Calibri, 11 pt

Formatted: Font: Calibri, 11 pt, Italic

Formatted: Font: Calibri, 11 pt

Formatted: Font: Calibri, 11 pt, Italic

Formatted: Font: Calibri, 11 pt

Formatted: Font: Calibri, 11 pt, Italic

Formatted: Font: Calibri, 11 pt

Formatted: Font: Calibri, 11 pt, Italic

Formatted: Font: Calibri, 11 pt

Formatted: Font: Calibri, 11 pt, Italic

Formatted: Font: Calibri, 11 pt

Formatted: Font: Calibri, 11 pt, Italic

Formatted: Font: Calibri, 11 pt

Formatted: Font: Calibri, 11 pt, Italic

Formatted: Font: Calibri, 11 pt

Formatted: Font: Calibri, 11 pt, Italic

Formatted: Font: Calibri, 11 pt

Formatted: Indent: Left: 0", First line: 0"

12. Weisenberger DJ, Campan M, Long TI, Kim M, Woods C, Fiala E, et al. Analysis of repetitive element DNA methylation by MethyLight. *Nucleic Acids Res* 2005;33(21):6823-36.
13. Gravina S, Vijg J. Epigenetic factors in aging and longevity. *Pflugers Arch* 2010;459(2):247-58.
14. Dean W, Lucifero D, Santos F. DNA methylation in mammalian development and disease. *Birth Defects Res C Embryo Today* 2005;75(2):98-111.
15. Baccarelli A, Wright R, Bollati V, Litonjua A, Zanobetti A, Tarantini L, et al. Ischemic heart disease and stroke in relation to blood DNA methylation. *Epidemiology* 2010;21(6):819-28.
16. Castro R, Rivera I, Struys EA, Jansen EE, Ravasco P, Camilo ME, et al. Increased homocysteine and S-adenosylhomocysteine concentrations and DNA hypomethylation in vascular disease. *Clin Chem* 2003;49(8):1292-6.
17. Kim M, Long TI, Arakawa K, Wang R, Yu MC, Laird PW. DNA methylation as a biomarker for cardiovascular disease risk. *PLoS One* 2010;5(3):e9692.
18. Bollati V, Galimberti D, Pergoli L, Dalla Valle E, Barretta F, Cortini F, et al. DNA methylation in repetitive elements and Alzheimer disease. *Brain Behav Immun* 2011.
19. Baccarelli A, Tarantini L, Wright RO, Bollati V, Litonjua AA, Zanobetti A, et al. Repetitive element DNA methylation and circulating endothelial and inflammation markers in the VA normative aging study. *Epigenetics* 2010;5(3).
20. Crow MK. Long interspersed nuclear elements (LINE-1): potential triggers of systemic autoimmune disease. *Autoimmunity* 2010;43(1):7-16.
21. Sood A, Petersen H, Blanchette CM, Meek P, Picchi MA, Belinsky SA, et al. Wood smoke exposure and gene promoter methylation are associated with increased risk for COPD in smokers. *Am J Respir Crit Care Med* 2010;182(9):1098-104.
22. Qiu W, Baccarelli A, Carey VJ, Boutaoui N, Bacherman H, Klanderman B, et al. Variable DNA methylation is associated with chronic obstructive pulmonary disease and lung function. *Am J Respir Crit Care Med* 2012;185(4):373-81.
23. Lange NE, Sordillo JE, Tarantini L, Bollati V, Sparrow D, Vokonas P, et al. Global DNA Methylation and Lung Function in the Normative Aging Study [abstract]. *Am J Respir Crit Care Med* 2011;183:A5694.
24. Bell B, Rose C, Damon A. The Normative Aging Study: an interdisciplinary and longitudinal study of health and aging. *Aging and Human Development* 1972;3:5-17.
25. Sparrow D, O'Connor G, Colton T, Barry CL, Weiss ST. The relationship of nonspecific bronchial responsiveness to the occurrence of respiratory symptoms and decreased levels of pulmonary function. The Normative Aging Study. *Am Rev Respir Dis* 1987;135(6):1255-60.
26. Standardization of spirometry—1987 update. Statement of the American Thoracic Society. *Am Rev Respir Dis* 1987;136(5):1285-98.
27. Standardization of Spirometry, 1994 Update. American Thoracic Society. *Am J Respir Crit Care Med* 1995;152(3):1107-36.
28. Crapo RO, Morris AH, Gardner RM. Reference spirometric values using techniques and equipment that meet ATS recommendations. *Am Rev Respir Dis* 1981;123(6):659-64.
29. Global Initiative for Chronic Obstructive Lung Disease. Global strategy for the diagnosis, management, and prevention of chronic obstructive pulmonary disease. (Updated 2010) at <http://www.goldcopd.org/Guidelineitem.asp?l1=2&l2=1&intId=989>
30. Bollati V, Baccarelli A, Hou L, Bonzini M, Fustinoni S, Cavallo D, et al. Changes in DNA methylation patterns in subjects exposed to low dose benzene. *Cancer Res* 2007;67(3):876-80.
31. Baccarelli A, Wright RO, Bollati V, Tarantini L, Litonjua AA, Suh HH, et al. Rapid DNA methylation changes after exposure to traffic particles. *Am J Respir Crit Care Med* 2009;179(7):572-8.

Formatted: Indent: Left: 0", Hanging: 0.5"

32. Zhu ZZ, Hou L, Bollati V, Tarantini L, Marinelli B, Cantone L, et al. Predictors of global methylation levels in blood DNA of healthy subjects: a combined analysis. *Int J Epidemiol* 2010.
33. Breitling LP, Yang R, Korn B, Burwinkel B, Brenner H. Tobacco-smoking-related differential DNA methylation: 27K discovery and replication. *Am J Hum Genet* 2011;88(4):450-7.
34. Wan ES, Qiu W, Baccarelli A, Carey VJ, Bacherman H, Rennard SI, et al. Cigarette smoking behaviors and time since quitting are associated with differential DNA methylation across the human genome. *Hum Mol Genet* 2012;21(13):3073-82.
35. Jintaridh P, Mutirangura A. Distinctive patterns of age-dependent hypomethylation in interspersed repetitive sequences. *Physiol Genomics* 2010;41:194-200.
36. Zhu ZZ, Sparrow D, Hou L, Tarantini L, Bollati V, Litonjua AA, et al. Repetitive element hypomethylation in blood leukocyte DNA and cancer incidence, prevalence, and mortality in elderly individuals: the Normative Aging Study. *Cancer Causes Control* 2010;22(3):437-47.
37. Pilsner JR, Hu H, Ettinger A, Sanchez BN, Wright RO, Cantonwine D, et al. Influence of prenatal lead exposure on genomic methylation of cord blood DNA. *Environ Health Perspect* 2009;117(9):1466-71.
38. Rusiecki JA, Baccarelli A, Bollati V, Tarantini L, Moore LE, Bonfeld Jorgensen EC. Global DNA hypomethylation is associated with high serum persistent organic pollutants in Greenlandic Inuit. *Environ Health Perspect* 2008;116(11):1547-52.
39. Baccarelli A, Bollati V. Epigenetics and environmental chemicals. *Curr Opin Pediatr* 2009;21(2):243-51.
40. Valinluck V, Tsai HH, Rogstad DK, Burdzy A, Bird A, Sowers LC. Oxidative damage to methyl-CpG sequences inhibits the binding of the methyl-CpG binding domain (MBD) of methyl-CpG binding protein 2 (MeCP2). *Nucleic Acids Res* 2004;32(14):4100-8.
41. Norris J, Fan D, Aleman C, Marks JR, Futreal PA, Wiseman RW, et al. Identification of a new subclass of Alu DNA repeats which can function as estrogen receptor-dependent transcriptional enhancers. *J Biol Chem* 1995;270(39):22777-82.
42. Vansant G, Reynolds WF. The consensus sequence of a major Alu subfamily contains a functional retinoic acid response element. *Proc Natl Acad Sci U S A* 1995;92(18):8229-33.
43. Asada K, Kotake Y, Asada R, Saunders D, Broyles RH, Towner RA, et al. LINE-1 hypomethylation in a choline deficiency-induced liver cancer in rats: dependence on feeding period. *J Biomed Biotechnol* 2006;2006(1):17142.
44. Batzer MA, Deininger PL. Alu repeats and human genomic diversity. *Nat Rev Genet* 2002;3(5):370-9.
45. Andersen ZJ, Hvidberg M, Jensen SS, Ketzler M, Loft S, Sorensen M, et al. Chronic obstructive pulmonary disease and long-term exposure to traffic-related air pollution: a cohort study. *Am J Respir Crit Care Med* 2010;183(4):455-61.
46. Nussbaumer-Ochsner Y, Rabe KF. Systemic manifestations of COPD. *Chest* 2011;139(1):165-73.

Formatted: Indent: Left: 0", Hanging: 0.5"

1  
2  
3  
4  
5  
6  
7  
8  
9  
10  
11  
12  
13  
14  
15  
16  
17  
18  
19  
20  
21  
22  
23  
24  
25  
26  
27  
28  
29  
30  
31  
32  
33  
34  
35  
36  
37  
38  
39  
40  
41  
42  
43  
44  
45  
46  
47  
48  
49  
50  
51  
52  
53  
54  
55  
56  
57  
58  
59  
60

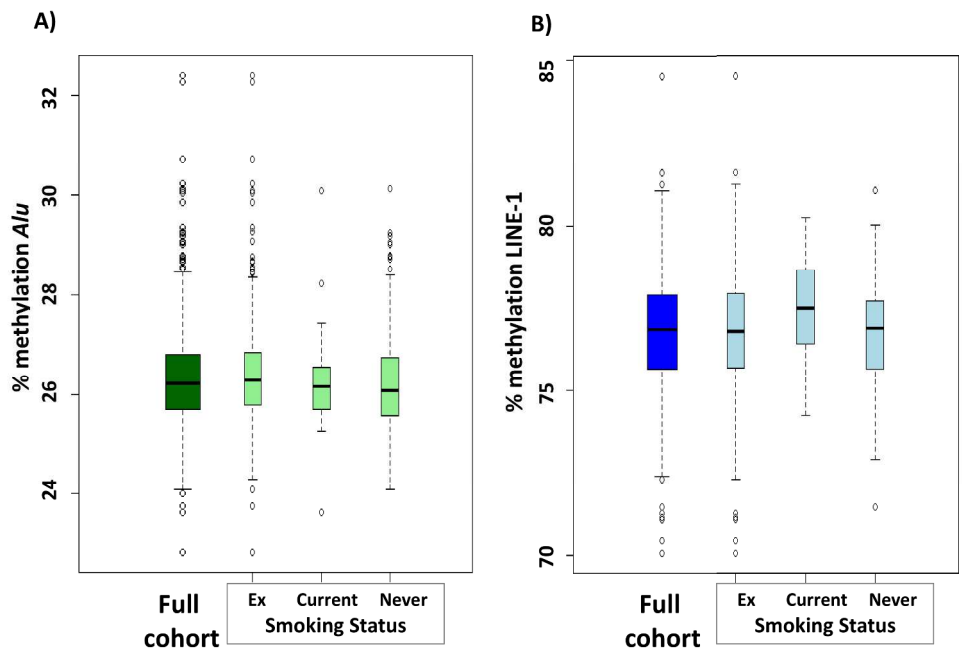

254x190mm (300 x 300 DPI)

View only



1  
2  
3  
4  
5  
6  
7  
8  
9  
10  
11  
12  
13  
14  
15  
16  
17  
18  
19  
20  
21  
22  
23  
24  
25  
26  
27  
28  
29  
30  
31  
32  
33  
34  
35  
36  
37  
38  
39  
40  
41  
42  
43  
44  
45  
46  
47  
48  
49  
50  
51  
52  
53  
54  
55  
56  
57  
58  
59  
60

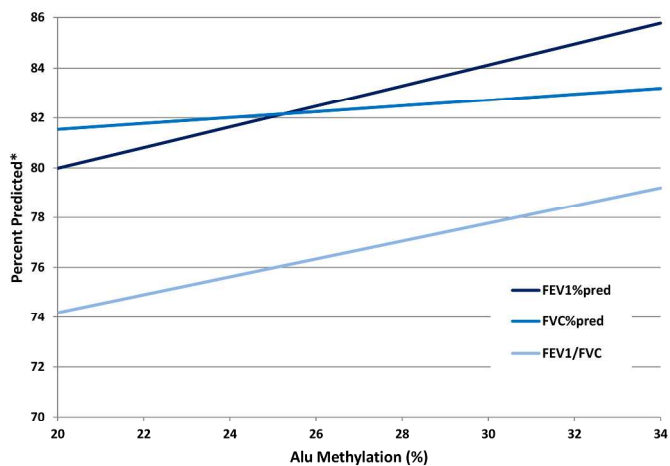

254x190mm (300 x 300 DPI)

ew only
